# Supplementary material for: Maternal cortisol is associated with neonatal amygdala microstructure and connectivity in a sexually dimorphic manner
Source: eLife. 2020 Nov 24;9:e60729. doi: 10.7554/eLife.60729 (PMC7685701; doi:10.7554/eLife.60729)
Supplement: Figure 1—source data 1. [file elife-60729-fig1-data1.xlsx]

## Sheet: Demographics
Maternal, newborn and sampling demographic information
ID	Maternal_cortisol	lg10_maternal_cortisol	Birth_gestation_weeks	BW_Zscore	SIMD2016_quintile	MRI_Gestation_weeks	Male0_female1
1	6.463	0.81	28.84	-1.4606	4	40.86	0
2	3.505	0.545	30.56	-0.216	2	40.29	0
3	3.505	0.545	30.56	-0.0003	2	40.29	0
4	4.273	0.631	39.56	2.0483	5	40.57	1
5	5.876	0.769	29.42	0.2954	1	40.57	1
6	5.876	0.769	29.42	-5.0699	1	40.57	1
7	11.54	1.062	40.42	-0.2548	4	41.86	0
8	18.803	1.274	23.84	-0.0611	2	41.14	0
9	4.939	0.694	37.84	-0.3022	4	41.29	0
10	3.469	0.54	41.42	0.4028	5	43.71	1
11	3.101	0.492	39.14	-0.0569	5	40.71	1
12	9.727	0.988	29.7	0.3792	2	41	1
13	5.569	0.746	38.42	-0.8177	3	41.86	1
14	37.585	1.575	39.28	0.9065	5	43.71	1
15	7.225	0.859	41.56	-0.4539	4	43.43	0
16	2.662	0.425	41	-0.1311	3	43.86	0
17	3.36	0.526	41	-0.3935	3	42.43	1
18	22.624	1.355	39.28	0.1426	1	41.57	0
19	16.376	1.214	39.84	0.5454	4	41.86	0
20	2.811	0.449	41	1.9696	5	43	1
21	1.281	0.107	28.14	-0.212	2	39.86	1
22	3.421	0.534	28.28	-2.3946	2	42.57	0
23	1.499	0.176	39.7	0.3552	4	41.86	0
24	8.637	0.936	30	-0.554	5	40.71	0
25	5.126	0.71	41.56	1.247	4	43.29	1
26	6.696	0.826	30.84	0.7946	1	42.43	1
27	0.785	-0.105	25.7	0.4887	5	40.29	0
28	10.606	1.026	40.42	-1.1544	5	41.86	0
29	1.595	0.203	31.42	-0.6533	4	39	0
30	1.595	0.203	31.42	-1.6398	4	40	0
31	1.134	0.054	31.28	0.8134	4	42.29	1
32	1.134	0.054	31.28	1.0171	4	42.29	1
33	6.289	0.799	40.42	1.6805	2	42.57	1
34	107.142	2.03	39	0.4801	3	42.57	1
35	4.406	0.644	30.84	0.514	2	40.57	0
36	2.401	0.38	38.84	-0.2179	5	41.71	1
37	32.277	1.509	40.14	1.3823	2	43.43	1
38	15.937	1.202	41.42	1.3834	5	43.57	1
39	4.91	0.691	41.28	0.3445	3	43	1
40	5.027	0.701	27	1.1036	3	41.86	0
41	5.734	0.758	26.14	-1.7521	5	42.43	1
42	5.734	0.758	26.14	-0.4512	5	41.43	0
43	41.538	1.618	40.42	0.9827	3	42	1
44	7.1	0.851	31.28	-0.1334	2	38.57	0
45	1.005	0.002	28	-1.4204	4	38.86	1
46	12.127	1.084	29.14	-0.419	3	41.29	0
47	3.718	0.57	27.28	0.749	5	45.43	1
48	5.559	0.745	31.42	0.6194	5	38.57	0
49	21.087	1.324	29	0.2309	3	40.14	0
50	0.463	-0.334	31.56	0.2121	3	44.29	0
51	37.228	1.571	41.56	0.8464	5	44.14	0
52	4.226	0.626	27.86	1.4709	4	41.29	0
53	5.532	0.743	39.43	0.2857	5	42.71	0
54	6.679	0.825	39.28	0.828	5	40.43	0
55	15.531	1.191	42.14	-0.0457	4	44.29	1
56	14.293	1.155	42.14	0.2253	4	44.57	0
57	3.95	0.597	39.14	-0.1514	5	41	0
58	2.292	0.36	40.28	-2.2952	5	42.14	1
59	3.511	0.545	40	1.081	5	43.14	1
60	5.915	0.772	38.28	0.5258	5	41.86	0
61	8.663	0.938	28.84	0.5977	2	40.86	1
62	18.68	1.271	26.56	0.3096	1	39.14	0
63	18.68	1.271	26.56	0.9011	1	39.14	0
64	5.058	0.704	31.56	1.3761	5	45.86	0
65	3.46	0.539	41.29	-0.1276	5	44.14	1
66	1.6	0.204	29.28	0.2993	5	39.57	0
67	5.818	0.765	37.84	-0.2407	5	41.71	1
68	7.687	0.886	41	1.154	5	44.14	1
69	4.132	0.616	39	0.5104	2	42	0
70	7.518	0.876	41.28	-1.1182	5	43.14	0
71	13.729	1.138	39	1.0822	2	42	0
72	1.056	0.024	40.14	0.3818	4	42.86	0
73	5.513	0.741	40.14	0.7848	2	43	1
74	7.456	0.872	40.28	0.6211	5	42.57	0
75	2.188	0.34	40.28	1.4201	5	41.57	1
76	7.04	0.848	31.14	1.056	5	41.86	0
77	7.04	0.848	31.14	2.1408	5	41.86	0
78	5.529	0.743	31.86	0.3439	2	41	0

## Sheet: Left side amygdala metrics
	Number of streamlines between the left named region and left amygdala																																									Mean FA of streamlines between the left named region and left amygdala
ID	bankssts_ctx	caudalanteriorcingulate_ctx	caudalmiddlefrontal_ctx	cuneus_ctx	entorhinal_ctx	fusiform_ctx	inferiorparietal_ctx	inferiortemporal_ctx	isthmuscingulate_ctx	lateraloccipital_ctx	lateralorbitofrontal_ctx	lingual_ctx	medialorbitofrontal_ctx	middletemporal_ctx	parahippocampal_ctx	paracentral_ctx	parsopercularis_ctx	parsorbitalis_ctx	parstriangularis_ctx	pericalcarine_ctx	postcentral_ctx	posteriorcingulate_ctx	precentral_ctx	precuneus_ctx	rostralanteriorcingulate_ctx	rostralmiddlefrontal_ctx	superiorfrontal_ctx	superiorparietal_ctx	superiortemporal_ctx	supramarginal_ctx	frontalpole_ctx	temporalpole_ctx	transversetemporal_ctx	insula_ctx	cerebellar_hemisphere	thalamus	caudate	putamen	pallidum	hippocampus	accumbens	FA_bankssts_ctx	FA_caudalanteriorcingulate_ctx	FA_caudalmiddlefrontal_ctx	FA_cuneus_ctx	FA_entorhinal_ctx	FA_fusiform_ctx	FA_inferiorparietal_ctx	FA_inferiortemporal_ctx
1	0.0042988	0.0055987	0.0073117	0.0026067	0.02228	0.10035	0.039757	0.21559	0.0073293	0.036952	0.098109	0.022205	0.04811	0.13703	0.0059591	0.011841	0.013093	0.0060253	0.0077868	0.0040885	0.046739	0.0092761	0.043883	0.018361	0.013526	0.027231	0.057804	0.043375	0.10082	0.048996	0.0016055	0.075631	0.010308	0.14016	0.013628	0.38802	0.16152	0.26328	0.045397	0.01762	0.015807	0.22456	0.27016	0.25269	0.23583	0.1949	0.19037	0.22995	0.19563
2	0.0044518	0.0071347	0.0095077	0.0092377	0.012412	0.074305	0.043512	0.20903	0.010216	0.071841	0.095139	0.02114	0.078357	0.17643	0.012342	0.017515	0.0076115	0.0071267	0.0047276	0.011617	0.039229	0.015937	0.069609	0.021051	0.01075	0.027849	0.048707	0.044417	0.12852	0.037343	0.0017698	0.12236	0.016902	0.1993	0.021124	0.44502	0.14091	0.30269	0.080761	0.044216	0.041702	0.19584	0.2348	0.24325	0.24227	0.19142	0.18017	0.22617	0.17477
3	0.0051376	0.0025451	0.010657	0.0050811	0.013005	0.069556	0.044225	0.30864	0.017756	0.05263	0.093871	0.051531	0.052689	0.17813	0.022135	0.015173	0.013375	0.005007	0.0069372	0.013897	0.040185	0.011494	0.046317	0.01705	0.0099708	0.028575	0.038688	0.04795	0.15716	0.04016	0.0012402	0.053874	0.024603	0.18071	0.028572	0.39768	0.16481	0.34072	0.055143	0.04354	0.03281	0.20825	0.23002	0.23031	0.2386	0.18354	0.19034	0.23105	0.18502
4	0.0038328	0.0047481	0.0073624	0.0065816	0.0066853	0.071528	0.04004	0.14511	0.012154	0.023957	0.077974	0.015776	0.053093	0.14374	0.017098	0.018713	0.0093689	0.0047092	0.0052341	0.0085131	0.070574	0.010446	0.066891	0.020199	0.0073767	0.019494	0.041614	0.071873	0.15078	0.060831	0.0008856	0.06207	0.033357	0.16684	0.015953	0.38626	0.11821	0.30938	0.059955	0.040156	0.028702	0.23449	0.26343	0.25226	0.25751	0.19667	0.19943	0.24093	0.1995
5	0.0083275	0.0079486	0.0044949	0.0039571	0.012383	0.083159	0.032341	0.22748	0.014317	0.037815	0.080571	0.024157	0.060463	0.1656	0.010138	0.0099514	0.0080267	0.0050466	0.0048088	0.0032909	0.049292	0.014303	0.046127	0.019793	0.0088071	0.026474	0.035457	0.03813	0.15822	0.054932	0.0011271	0.092753	0.0096908	0.15524	0.020345	0.41466	0.14938	0.21315	0.054322	0.043544	0.029257	0.23308	0.24594	0.25092	0.24957	0.20432	0.2049	0.23609	0.199
6	0.0066973	0.00035538	0.0035993	0.0018221	0.0028485	0.031556	0.03676	0.10605	0.001216	0.032056	0.11156	0.0088353	0.069285	0.11554	0.0024211	0.010891	0.011899	0.0048419	0.0054172	0.0024309	0.037977	9.75e-05	0.023281	0.013182	0.014156	0.023673	0.03118	0.013636	0.19	0.026347	0.0011616	0.023295	0.0082211	0.047907	0.0031352	0.19668	0.15325	0.022621	0.0043336	0.013803	0.0057743	0.21149	0.16641	0.18842	0.18852	0.17582	0.18307	0.19382	0.17851
7	0.0013875	0.0023988	0.0089133	0.005028	0.0055501	0.045765	0.041407	0.076953	0.008526	0.02472	0.13488	0.011223	0.098964	0.098998	0.012151	0.011314	0.0083131	0.0068219	0.0065415	0.0039021	0.046511	0.011129	0.034425	0.029412	0.012303	0.015917	0.030388	0.051149	0.10786	0.039179	0.0001436	0.061895	0.010698	0.10978	0.029156	0.3863	0.10591	0.25341	0.077983	0.042395	0.055127	0.24544	0.2624	0.2576	0.28391	0.2283	0.24468	0.26407	0.23374
8	0.0070822	0.0028903	0.015664	0.0020928	0.000892	0.045649	0.024843	0.056829	0.0009093	0.030983	0.072451	0.0076418	0.042966	0.34416	0.0014194	0.019367	0.0043304	0.008218	0.0032537	0.0018678	0.03213	0.0078361	0.061687	0.030512	0.0083074	0.035673	0.03421	0.025828	0.41409	0.054635	0.0005662	0.016589	0.025494	0.21523	0.016632	0.3378	0.10123	0.30142	0.034367	0.0049282	0.024698	0.19544	0.17817	0.19969	0.18162	0.14101	0.14096	0.19185	0.13511
9	0.003408	0.0051211	0.012632	0.0059123	0.0078656	0.041785	0.060805	0.10588	0.014039	0.046816	0.14129	0.021697	0.11172	0.161	0.0088069	0.018091	0.023853	0.019986	0.012306	0.011288	0.069259	0.017516	0.060971	0.040437	0.00593	0.029817	0.055878	0.091799	0.15769	0.079272	0.0063772	0.13721	0.025648	0.23047	0.022622	0.43257	0.15579	0.36357	0.11019	0.032812	0.04714	0.22968	0.25397	0.24181	0.28038	0.21611	0.22487	0.25116	0.21959
10	0.0094914	0.0038529	0.0078607	0.0033864	0.01445	0.059013	0.052863	0.14322	0.010365	0.033233	0.1397	0.018818	0.087734	0.10095	0.018117	0.017582	0.012417	0.0070711	0.0066971	0.0052754	0.03604	0.011737	0.056865	0.016177	0.014578	0.026339	0.051006	0.05074	0.085377	0.037405	0.0031545	0.020582	0.0098193	0.16298	0.034468	0.43572	0.17627	0.33154	0.083363	0.040691	0.048347	0.26671	0.27736	0.27538	0.31512	0.23469	0.24436	0.29033	0.23859
11	0.0036497	0.0036283	0.0090922	0.0048358	0.018302	0.083526	0.043313	0.11869	0.0074038	0.027277	0.091303	0.016885	0.059904	0.12908	0.010976	0.016417	0.013492	0.0072209	0.0085159	0.01035	0.042158	0.0069336	0.04935	0.023448	0.0098001	0.047045	0.045313	0.048011	0.11977	0.061116	0.002068	0.042785	0.017683	0.18732	0.031017	0.2984	0.094608	0.23366	0.069086	0.02081	0.020727	0.2384	0.23094	0.24938	0.26068	0.2226	0.21522	0.24864	0.213
12	0.010577	0.0062163	0.0046511	0.0043669	0.0068001	0.10014	0.073206	0.14482	0.010978	0.045046	0.092885	0.020807	0.045248	0.14408	0.0067298	0.010547	0.0091005	0.0090901	0.0051399	0.013715	0.041528	0.012378	0.028441	0.038256	0.0090931	0.028617	0.036715	0.048869	0.20342	0.047791	0.0007935	0.060921	0.017783	0.20918	0.017778	0.33643	0.11217	0.31566	0.049492	0.033724	0.021818	0.24591	0.25373	0.23823	0.26534	0.21251	0.20667	0.24801	0.20139
13	0.0033817	0.0059597	0.015912	0.0074048	0.020258	0.083702	0.058544	0.22482	0.013445	0.047878	0.11174	0.03826	0.089471	0.13798	0.036901	0.026407	0.017776	0.008197	0.0082053	0.017997	0.090643	0.015525	0.094247	0.030199	0.016002	0.036373	0.067997	0.074176	0.1695	0.062103	0.0013785	0.28297	0.023859	0.1922	0.037789	0.55643	0.23309	0.65812	0.17344	0.061206	0.073333	0.26882	0.29008	0.27045	0.2827	0.24299	0.22866	0.26891	0.21677
14	0.0031287	0.0027088	0.014045	0.0060232	0.015531	0.11139	0.065853	0.088857	0.025146	0.044159	0.145	0.019495	0.082708	0.077224	0.014541	0.022425	0.0207	0.015558	0.012481	0.01267	0.062694	0.018823	0.094331	0.030804	0.010483	0.036409	0.058603	0.083318	0.12795	0.062248	0.0006868	0.14571	0.022655	0.29338	0.035489	0.55773	0.16574	0.47901	0.1557	0.081078	0.050908	0.27139	0.27498	0.27501	0.29705	0.25929	0.25103	0.27553	0.25021
15	0.0057078	0.0038584	0.0076627	0.0048137	0.005577	0.063385	0.045454	0.087942	0.0099074	0.03418	0.091982	0.02696	0.075141	0.12601	0.0079548	0.018354	0.010046	0.010427	0.010171	0.024853	0.056706	0.023518	0.061995	0.026692	0.021788	0.01614	0.038174	0.065791	0.13565	0.03449	0.0015449	0.059027	0.019475	0.21659	0.02839	0.39581	0.15735	0.40061	0.10062	0.029368	0.055375	0.24132	0.24423	0.25492	0.2811	0.22129	0.22354	0.25617	0.21982
16	0.010382	0.0034135	0.015838	0.010435	0.011109	0.065199	0.07163	0.11094	0.0094483	0.047635	0.1574	0.034824	0.064854	0.13966	0.017984	0.02474	0.011959	0.0062702	0.0078733	0.011646	0.096252	0.018294	0.070698	0.034649	0.0087146	0.03612	0.064432	0.070813	0.1209	0.096227	0.0002034	0.033153	0.040154	0.18594	0.045321	0.62706	0.16082	0.43055	0.10792	0.039832	0.067727	0.25962	0.28759	0.28411	0.29663	0.24259	0.2494	0.27564	0.24995
17	0.0040991	0.0024947	0.0072881	0.0063128	0.010209	0.090523	0.059783	0.12943	0.015041	0.028695	0.094955	0.020706	0.087094	0.14829	0.0095549	0.018865	0.011612	0.0062388	0.004223	0.0062466	0.073927	0.0085734	0.055431	0.024198	0.010485	0.013876	0.048697	0.064219	0.23943	0.059384	0.0016856	0.17911	0.029869	0.13898	0.024039	0.32065	0.11063	0.24741	0.071523	0.032192	0.039276	0.24358	0.27887	0.26224	0.2803	0.21483	0.23267	0.26352	0.22371
18	0.0034968	0.0021218	0.006727	0.01002	0.031093	0.13763	0.043542	0.08752	0.0073483	0.042599	0.061424	0.02657	0.041322	0.12197	0.019436	0.010328	0.0080495	0.0077107	0.0062696	0.022342	0.046001	0.0085744	0.036416	0.030089	0.01107	0.03252	0.041227	0.074201	0.091077	0.070169	0.0003741	0.016306	0.033879	0.16183	0.0078642	0.40611	0.11444	0.28587	0.038886	0.077806	0.020225	0.23043	0.24955	0.24683	0.27017	0.20197	0.21003	0.25196	0.21641
19	0.0037434	0.0029075	0.015174	0.0062409	0.021585	0.11411	0.051572	0.14379	0.010524	0.038211	0.086703	0.013468	0.032226	0.1193	0.010663	0.014485	0.011155	0.0086188	0.0090931	0.013587	0.046695	0.0067127	0.056271	0.023036	0.0072897	0.022281	0.043834	0.061214	0.1244	0.066665	0.0009871	0.15933	0.020612	0.19354	0.027453	0.47105	0.15352	0.34995	0.12021	0.043853	0.054483	0.23455	0.24526	0.25067	0.26351	0.2149	0.22104	0.24635	0.21279
20	0.0085401	0.0051617	0.010613	0.0041834	0.015587	0.047527	0.054518	0.13832	0.0099912	0.037789	0.10589	0.017483	0.060509	0.13684	0.019884	0.024126	0.014556	0.0037666	0.0067326	0.0048181	0.053177	0.012886	0.067375	0.025535	0.0092106	0.016992	0.047801	0.067979	0.15062	0.046918	0.0018356	0.059677	0.013971	0.15794	0.029982	0.4513	0.12241	0.3005	0.065004	0.028686	0.030941	0.22716	0.26569	0.25743	0.2689	0.20339	0.21479	0.24885	0.21925
21	0.0041381	0.0043043	0.0038894	0.0073433	0.0063757	0.056716	0.051588	0.15654	0.0081785	0.04799	0.12644	0.019725	0.043898	0.18932	0.0063608	0.0095001	0.0089675	0.0080994	0.006985	0.0082155	0.035904	0.013491	0.027971	0.023998	0.0064049	0.035825	0.049327	0.04348	0.15842	0.048454	0.0014494	0.017737	0.02339	0.19392	0.015927	0.34945	0.1106	0.2085	0.036723	0.020089	0.021382	0.21284	0.25212	0.23699	0.26668	0.19638	0.20533	0.24198	0.1952
22	0.012442	0.0038065	0.018268	0.0079553	0.0030115	0.047437	0.079583	0.1414	0.0073183	0.060811	0.076744	0.02433	0.035164	0.09902	0.0044863	0.01959	0.0094016	0.0023906	0.0026881	0.0067922	0.054337	0.017134	0.060837	0.028716	0.004351	0.02373	0.056211	0.058329	0.11989	0.073284	0.0007412	0.026613	0.013247	0.20342	0.009875	0.30879	0.10897	0.23439	0.038928	0.028389	0.0201	0.19151	0.22724	0.24519	0.2331	0.17337	0.17786	0.22462	0.16707
23	0.0068347	0.0034178	0.0095908	0.011796	0.010232	0.044475	0.065476	0.10781	0.02704	0.055363	0.11678	0.020588	0.051567	0.12979	0.0057299	0.016503	0.013999	0.0045305	0.0047942	0.011937	0.055899	0.019932	0.054333	0.046034	0.0086137	0.023566	0.04967	0.0809	0.10787	0.044099	0.0003634	0.082735	0.0058572	0.10341	0.026119	0.481	0.15401	0.33422	0.13976	0.014544	0.038578	0.24149	0.26783	0.24757	0.25702	0.21799	0.22154	0.24068	0.20919
24	0.0082968	0.0034127	0.021063	0.0074767	0.0083326	0.033582	0.079582	0.12396	0.0094515	0.044318	0.082373	0.014879	0.053187	0.13488	0.0049634	0.014735	0.012068	0.0045884	0.0062802	0.0041876	0.04127	0.01339	0.040685	0.022267	0.014888	0.056778	0.091528	0.044028	0.13522	0.042075	0.001111	0.04329	0.0098479	0.18375	0.013666	0.38504	0.11934	0.2755	0.046355	0.026701	0.022954	0.21615	0.21543	0.1977	0.22722	0.19901	0.20241	0.2211	0.19141
25	0.0079997	0.0022229	0.013824	0.0042054	0.0070391	0.068164	0.053405	0.11673	0.0089656	0.050887	0.10065	0.020066	0.063795	0.13608	0.0076452	0.023072	0.01625	0.0071449	0.0076378	0.010445	0.05638	0.017809	0.068577	0.028111	0.011253	0.015438	0.058506	0.05519	0.16511	0.070496	0.0008414	0.10969	0.017283	0.1933	0.017344	0.40268	0.14724	0.40781	0.075328	0.030213	0.045933	0.27531	0.27188	0.27043	0.30438	0.24435	0.25361	0.28957	0.25016
26	0.0080393	0.0026461	0.017502	0.0068008	0.0065984	0.079066	0.077354	0.21877	0.0078681	0.059053	0.08619	0.033817	0.054796	0.24099	0.010057	0.020018	0.0064964	0.0040875	0.0053569	0.0092524	0.042745	0.020367	0.04291	0.024704	0.012865	0.019348	0.041502	0.04693	0.22244	0.049783	0.0005625	0.056877	0.012838	0.20088	0.014894	0.39056	0.11372	0.28719	0.048171	0.030379	0.024816	0.24165	0.27844	0.28837	0.29779	0.21235	0.22507	0.2741	0.2077
27	0.0035386	0.0029471	0.0097875	0.0028352	0.0035841	0.1159	0.041443	0.17851	0.0037286	0.044733	0.062069	0.034535	0.057115	0.14279	0.024204	0.011015	0.0092726	0.0052092	0.0049921	0.0037861	0.026603	0.0025492	0.026549	0.0096271	0.012364	0.015984	0.026189	0.022586	0.14528	0.033938	0.0001271	0.03371	0.015374	0.1559	0.013454	0.23759	0.086869	0.17543	0.031644	0.026744	0.022111	0.19539	0.24609	0.23297	0.23569	0.17943	0.1585	0.21494	0.17139
28	0.0051377	0.0032064	0.0082132	0.010771	0.0031346	0.061798	0.050464	0.14938	0.0090174	0.038038	0.098489	0.036693	0.063201	0.14645	0.013832	0.0094866	0.016039	0.0059109	0.0076032	0.0052769	0.033802	0.011746	0.030466	0.032776	0.0084743	0.025747	0.027936	0.051595	0.11761	0.039817	0.0017299	0.0087737	0.026153	0.14073	0.01692	0.35978	0.16037	0.21049	0.058225	0.027496	0.047999	0.25552	0.28155	0.25295	0.27625	0.2308	0.24138	0.26116	0.23832
29	0.0037909	0.0019516	0.010533	0.0028464	0.0071986	0.059793	0.040192	0.16511	0.0058719	0.019107	0.087244	0.023023	0.056724	0.1633	0.012274	0.0063091	0.010269	0.0084612	0.0081443	0.0070495	0.026285	0.0017501	0.024822	0.0063873	0.0072717	0.036396	0.039525	0.03025	0.17043	0.041277	0.0030366	0.049524	0.035986	0.20817	0.020078	0.31216	0.1328	0.23574	0.043669	0.049442	0.030146	0.20984	0.20355	0.20369	0.20854	0.16965	0.1784	0.20586	0.1731
30	0.0044393	0.0024527	0.010591	0.0080872	0.0035852	0.08794	0.067232	0.16085	0.0065368	0.062077	0.071004	0.02519	0.062809	0.10747	0.017996	0.016465	0.011955	0.0061628	0.010975	0.0063603	0.043826	0.01643	0.044464	0.018828	0.022632	0.029292	0.045802	0.041647	0.14531	0.06296	0.0005142	0.040167	0.027206	0.11171	0.014898	0.33989	0.15778	0.18892	0.026078	0.024814	0.022312	0.20314	0.25377	0.2272	0.26147	0.20735	0.19354	0.23314	0.19151
31	0.010691	0.0027495	0.0090677	0.0075914	0.01812	0.14303	0.048438	0.19944	0.0095435	0.038416	0.062595	0.04352	0.042433	0.15304	0.031775	0.01709	0.0048118	0.0038069	0.0035431	0.012667	0.02886	0.019739	0.046642	0.023247	0.0059795	0.019393	0.052806	0.047248	0.12166	0.031308	0.0005386	0.11506	0.0062464	0.15106	0.022487	0.42015	0.10916	0.20437	0.045382	0.072309	0.03459	0.2526	0.2871	0.27457	0.27819	0.20586	0.20477	0.25994	0.19949
32	0.0069992	0.0033197	0.012272	0.0060906	0.0031585	0.062895	0.054508	0.15727	0.017498	0.042668	0.084293	0.026612	0.04525	0.17688	0.0071292	0.012973	0.0075193	0.0054032	0.0045663	0.031563	0.041302	0.022411	0.031432	0.024293	0.0059911	0.017826	0.053136	0.044559	0.13579	0.032257	0.0002666	0.049225	0.020506	0.17066	0.01416	0.36734	0.13931	0.22776	0.034543	0.030876	0.034632	0.22069	0.27097	0.27421	0.27984	0.19962	0.20248	0.25379	0.1978
33	0.0028381	0.0012962	0.0068093	0.0046215	0.0080802	0.10304	0.042411	0.11503	0.0077705	0.024334	0.0783	0.020737	0.044885	0.11361	0.0082022	0.014258	0.021468	0.0099348	0.0054046	0.0060398	0.050032	0.0078563	0.041485	0.014447	0.004182	0.015736	0.041598	0.038116	0.27215	0.049869	0.0015577	0.11533	0.031681	0.19145	0.019802	0.29332	0.09117	0.3215	0.080677	0.042871	0.029478	0.25527	0.2741	0.24547	0.29207	0.20778	0.2133	0.27153	0.21657
34	0.0035156	0.0065355	0.019863	0.0056443	0.01325	0.08231	0.059387	0.1012	0.012017	0.036401	0.1047	0.020223	0.050943	0.13877	0.02267	0.021592	0.016066	0.013213	0.011416	0.0058116	0.042633	0.028758	0.050929	0.035337	0.006693	0.028088	0.048377	0.050671	0.18134	0.062682	0.00182	0.070354	0.027776	0.34237	0.018969	0.44615	0.13406	0.38786	0.062125	0.076958	0.049386	0.25936	0.28484	0.26498	0.31068	0.23376	0.23018	0.2838	0.24113
35	0.0063824	0.0024806	0.015319	0.0050586	0.0081942	0.039524	0.059599	0.14887	0.0075555	0.049078	0.12988	0.018958	0.10561	0.15541	0.0060216	0.01636	0.011405	0.0055711	0.005801	0.008754	0.04121	0.0062177	0.064283	0.018863	0.034203	0.025055	0.058623	0.055902	0.13191	0.062486	0.0013443	0.046004	0.0061963	0.13699	0.020048	0.32123	0.16846	0.26557	0.035671	0.03404	0.047309	0.20831	0.25795	0.25551	0.23744	0.20297	0.19698	0.2296	0.18914
36	0.0018136	0.0060914	0.015532	0.0075724	0.013023	0.061317	0.039214	0.14263	0.013538	0.028875	0.13308	0.026704	0.069994	0.086323	0.0097674	0.013698	0.021181	0.011036	0.011864	0.017845	0.042559	0.027709	0.05066	0.026173	0.018285	0.035258	0.040568	0.051043	0.12816	0.032237	0.0019129	0.14114	0.017502	0.20291	0.022293	0.38884	0.18989	0.3663	0.071146	0.042851	0.066944	0.24129	0.23943	0.23983	0.2776	0.21532	0.22486	0.24971	0.21338
37	0.0039849	0.0083406	0.011566	0.011051	0.0081863	0.042357	0.063545	0.14236	0.025473	0.058847	0.1409	0.029353	0.054327	0.14891	0.010908	0.025255	0.020152	0.0071134	0.0073296	0.0082761	0.057934	0.020808	0.061736	0.054144	0.010724	0.023688	0.054892	0.072658	0.17662	0.061185	0.0014098	0.1565	0.020377	0.21473	0.02116	0.46349	0.15451	0.37139	0.083947	0.032888	0.051061	0.25419	0.28004	0.24073	0.29137	0.22509	0.2296	0.26666	0.21785
38	0.0042899	0.0044793	0.016214	0.0082947	0.017922	0.070011	0.061078	0.12121	0.0089605	0.043955	0.098004	0.022622	0.045119	0.13426	0.016063	0.016884	0.013534	0.0057091	0.0052059	0.0045914	0.067792	0.014499	0.078877	0.028795	0.0068345	0.027189	0.052565	0.062669	0.1379	0.057634	8.62e-05	0.015631	0.025257	0.21107	0.013509	0.30062	0.12217	0.29838	0.053559	0.040488	0.0294	0.26216	0.28453	0.27336	0.28275	0.24909	0.2289	0.26828	0.23433
39	0.0065166	0.003777	0.010613	0.006257	0.0055376	0.047776	0.044225	0.1223	0.011996	0.064512	0.11516	0.023251	0.053213	0.10978	0.0094959	0.018298	0.0085305	0.0095838	0.0070907	0.01763	0.04715	0.016238	0.044379	0.028108	0.0091099	0.025657	0.040722	0.056024	0.11692	0.032647	0.0008352	0.027575	0.027477	0.16432	0.02176	0.45237	0.14833	0.33507	0.078923	0.022646	0.039035	0.24375	0.25469	0.26993	0.2734	0.23338	0.22847	0.24783	0.22416
40	0.010078	0.0063203	0.0078492	0.0060195	0.013248	0.054482	0.067989	0.15047	0.0062905	0.036441	0.10646	0.021999	0.057835	0.11459	0.0080443	0.014381	0.01056	0.0056521	0.0057258	0.0086529	0.051879	0.020523	0.045577	0.028095	0.012236	0.016408	0.048646	0.060722	0.096245	0.061468	8.27e-05	0.073905	0.017316	0.15711	0.023071	0.47293	0.18428	0.3087	0.078366	0.059342	0.045298	0.2429	0.26729	0.27886	0.27946	0.21954	0.20263	0.2604	0.20928
41	0.0088073	0.0057495	0.01754	0.003462	0.0019767	0.066944	0.0515	0.14112	0.0066319	0.045299	0.087849	0.019996	0.056053	0.10718	0.01106	0.014249	0.012057	0.0063903	0.0063575	0.0040119	0.034281	0.016728	0.042166	0.02688	0.0094456	0.035346	0.055202	0.040272	0.13448	0.049148	0.002103	0.026219	0.0092337	0.14016	0.014713	0.31839	0.14782	0.24665	0.036922	0.030601	0.023525	0.2515	0.24662	0.24503	0.2583	0.22404	0.20952	0.24815	0.20642
42	0.0033031	0.0011128	0.011317	0.0060935	0.0063622	0.062356	0.050432	0.13477	0.0097785	0.040048	0.095539	0.024141	0.042923	0.099092	0.0073107	0.0096036	0.0085341	0.0032144	0.0042178	0.0083378	0.033366	0.0086363	0.027815	0.027897	0.012337	0.036171	0.035415	0.04158	0.081662	0.047857	0.0011783	0.038135	0.012333	0.12874	0.013041	0.29022	0.11269	0.20654	0.027912	0.020652	0.025913	0.23951	0.25644	0.2469	0.26703	0.20388	0.21653	0.24852	0.19165
43	0.0021617	0.0031978	0.011907	0.007451	0.0070768	0.061124	0.044639	0.11884	0.017882	0.049408	0.13324	0.023595	0.04306	0.13418	0.0095131	0.019552	0.014078	0.0089661	0.01019	0.0080639	0.068228	0.011903	0.065364	0.030618	0.0042004	0.03403	0.049175	0.094194	0.13459	0.040128	0.0009724	0.12012	0.012868	0.1892	0.022609	0.35828	0.14386	0.26369	0.05037	0.027422	0.050466	0.23208	0.25944	0.25137	0.26081	0.2157	0.22592	0.2396	0.22074
44	0.0024821	0.0044575	0.011538	0.0091639	0.0077836	0.059311	0.057512	0.15254	0.01073	0.0469	0.093283	0.040619	0.061569	0.098313	0.010057	0.014385	0.014311	0.013507	0.013624	0.020129	0.043782	0.01745	0.047518	0.033592	0.014491	0.043114	0.072258	0.056394	0.10319	0.052429	0.0006007	0.059243	0.010997	0.14522	0.019112	0.39857	0.13218	0.3175	0.084126	0.021359	0.028116	0.2201	0.24218	0.22975	0.24898	0.18347	0.19622	0.22852	0.18506
45	0.0035046	0.0067483	0.012181	0.0033038	0.0026285	0.060805	0.033079	0.10279	0.0083809	0.039154	0.09397	0.011277	0.043133	0.1149	0.0049921	0.0095899	0.0095123	0.004022	0.0046393	0.0031816	0.032425	0.0089771	0.029438	0.020182	0.0063682	0.029848	0.04387	0.039657	0.0943	0.049569	0.0014401	0.052229	0.011633	0.16674	0.020527	0.32693	0.13396	0.18593	0.028375	0.022177	0.02212	0.21937	0.22455	0.20647	0.2417	0.19226	0.1969	0.2373	0.19104
46	0.0036791	0.0076286	0.014067	0.006269	0.003446	0.071548	0.06546	0.1621	0.01364	0.042524	0.094618	0.016251	0.0785	0.10772	0.015468	0.017303	0.013149	0.0067535	0.0099598	0.0057558	0.072838	0.016668	0.055435	0.03048	0.017497	0.029475	0.032749	0.076242	0.12671	0.075135	0.0022131	0.052896	0.02745	0.19794	0.019383	0.38695	0.18004	0.32736	0.060238	0.031765	0.02985	0.23521	0.23368	0.22614	0.25917	0.20702	0.20537	0.237	0.18646
47	0.0045584	0.0033657	0.0059695	0.007675	0.0041006	0.10856	0.041502	0.18908	0.015279	0.048739	0.078627	0.027129	0.041698	0.11055	0.019847	0.008203	0.017564	0.0087996	0.013324	0.0068146	0.036594	0.005648	0.029359	0.022709	0.0066643	0.029603	0.037756	0.04439	0.18606	0.043277	0.0005884	0.050412	0.022934	0.14485	0.015676	0.29925	0.12078	0.12792	0.027117	0.031702	0.016289	0.2316	0.25403	0.23884	0.25686	0.17886	0.18947	0.24025	0.18682
48	0.0094436	0.0041037	0.015633	0.0057763	0.0043009	0.055323	0.074321	0.13193	0.0061104	0.03683	0.059457	0.024277	0.082667	0.18471	0.0052149	0.019128	0.011709	0.0055609	0.0050268	0.0059601	0.07594	0.010183	0.070494	0.033434	0.01673	0.020708	0.053072	0.072449	0.088265	0.10398	0.002557	0.040725	0.013298	0.18069	0.019969	0.42115	0.13317	0.32834	0.06516	0.017369	0.051032	0.23382	0.2476	0.23044	0.24609	0.20597	0.21088	0.24262	0.20524
49	0.0072949	0.0039737	0.017865	0.004263	0.0067568	0.091659	0.049891	0.267	0.0069244	0.040071	0.084461	0.020608	0.070659	0.15044	0.025631	0.017851	0.013479	0.0038306	0.0045671	0.0047756	0.044904	0.0039881	0.048022	0.020658	0.012149	0.026592	0.052319	0.04176	0.12734	0.044547	0.0006135	0.15639	0.0066397	0.12173	0.020733	0.47245	0.1446	0.39235	0.075433	0.051417	0.032352	0.2215	0.24928	0.24369	0.23976	0.19109	0.19052	0.22342	0.17885
50	0.0048105	0.0045206	0.016781	0.0074264	0.023667	0.12613	0.067996	0.21273	0.025509	0.037529	0.12463	0.02676	0.067616	0.15581	0.014835	0.015641	0.015806	0.0077611	0.0065202	0.0070243	0.063861	0.011762	0.082358	0.049292	0.012319	0.023327	0.044232	0.10527	0.17789	0.073011	0.0001973	0.12798	0.02078	0.20155	0.032457	0.46412	0.13657	0.38709	0.072509	0.025381	0.026811	0.25724	0.26639	0.27899	0.29941	0.23847	0.23631	0.27703	0.2272
51	0.0092684	0.0026372	0.013059	0.0055166	0.008598	0.11008	0.052697	0.15139	0.0057395	0.034693	0.096124	0.019702	0.064535	0.17581	0.021871	0.016079	0.011745	0.0047722	0.0075244	0.024501	0.047418	0.017705	0.040212	0.026722	0.015605	0.021686	0.034945	0.035977	0.17896	0.055407	0.0012683	0.15561	0.02175	0.19515	0.019247	0.41925	0.15812	0.32325	0.066848	0.039442	0.055143	0.25718	0.25606	0.26506	0.28694	0.23276	0.22361	0.26319	0.2188
52	0.0021967	0.0034654	0.015832	0.0074285	0.012513	0.092396	0.037822	0.12517	0.0055724	0.03534	0.058706	0.020088	0.045824	0.11507	0.01051	0.018535	0.011582	0.011427	0.0096115	0.0097007	0.038169	0.0066065	0.046412	0.02218	0.020617	0.021602	0.051392	0.052761	0.16124	0.05363	0.0021668	0.092789	0.016946	0.16875	0.020363	0.38959	0.11305	0.2471	0.045942	0.037707	0.030404	0.24059	0.27691	0.27394	0.28222	0.21529	0.2133	0.26173	0.2198
53	0.0073921	0.0025539	0.0081167	0.0049761	0.010274	0.061703	0.056928	0.11289	0.010185	0.028207	0.09323	0.022038	0.055155	0.079511	0.03316	0.018522	0.0062843	0.0077899	0.0058576	0.018607	0.053639	0.017954	0.048703	0.018708	0.020196	0.020559	0.043685	0.053138	0.10543	0.057016	0.0002943	0.095406	0.020431	0.13412	0.02788	0.36606	0.10902	0.28932	0.064903	0.071475	0.020261	0.25067	0.2948	0.25508	0.29207	0.2263	0.22597	0.2678	0.22818
54	0.004506	0.0071466	0.010536	0.0055806	0.0093896	0.039317	0.051345	0.18919	0.013668	0.036215	0.12611	0.020921	0.091676	0.16576	0.018282	0.017918	0.0090511	0.0084856	0.0086342	0.0061929	0.049012	0.011302	0.07651	0.031618	0.010903	0.018043	0.056441	0.065178	0.23696	0.05505	0.0003435	0.053475	0.013197	0.14071	0.049456	0.40111	0.14521	0.34124	0.078427	0.036686	0.035372	0.23072	0.26514	0.25021	0.27879	0.21966	0.23029	0.25327	0.21298
55	0.0044107	0.0048625	0.01204	0.0049366	0.0059231	0.088418	0.045932	0.13717	0.012001	0.036144	0.12796	0.018307	0.089084	0.11147	0.01162	0.020222	0.014204	0.0094355	0.0064877	0.0046895	0.042292	0.011026	0.045922	0.015988	0.018968	0.020594	0.048188	0.034803	0.095534	0.035451	0.0018432	0.02431	0.0089139	0.1468	0.022909	0.41719	0.1456	0.34309	0.050772	0.029942	0.033393	0.28231	0.28705	0.28119	0.31437	0.25504	0.23943	0.29427	0.24541
56	0.0048065	0.0041652	0.011759	0.0094727	0.015496	0.057806	0.042069	0.10424	0.0083402	0.036947	0.078352	0.035858	0.045271	0.11814	0.018794	0.019592	0.016158	0.012988	0.0083928	0.015404	0.066862	0.012054	0.085792	0.025559	0.0088365	0.025712	0.049479	0.059566	0.13754	0.063758	0.0010788	0.039951	0.03325	0.24477	0.0206	0.3552	0.12199	0.3313	0.068252	0.026927	0.032221	0.25253	0.28338	0.2786	0.29807	0.23078	0.24234	0.27303	0.2353
57	0.0051021	0.0037559	0.015323	0.0082963	0.0090978	0.069323	0.040942	0.10551	0.0090424	0.029331	0.070301	0.017246	0.063823	0.14867	0.014996	0.017877	0.012469	0.0045037	0.005644	0.011696	0.06062	0.012869	0.064323	0.017166	0.0057756	0.024694	0.039665	0.050605	0.16185	0.044178	0.0021666	0.062652	0.015296	0.14888	0.021245	0.38297	0.1375	0.3507	0.077683	0.044137	0.035655	0.20903	0.26344	0.21513	0.26454	0.18936	0.20281	0.23751	0.19785
58	0.0017844	0.00229	0.01011	0.0068141	0.005555	0.055749	0.032974	0.088069	0.012138	0.025128	0.081341	0.016185	0.046001	0.14503	0.0094113	0.0135	0.015403	0.0080971	0.0081676	0.0097486	0.069674	0.0137	0.057874	0.019591	0.008206	0.021504	0.040248	0.065243	0.16166	0.044043	0	0.080264	0.021219	0.14891	0.015206	0.3655	0.15875	0.24864	0.053439	0.03539	0.021582	0.22189	0.23791	0.24906	0.26672	0.21361	0.22059	0.24661	0.21742
59	0.0060343	0.0018781	0.018583	0.0078183	0.0040616	0.043899	0.043798	0.11239	0.012002	0.040642	0.13258	0.018658	0.077959	0.095696	0.011085	0.024714	0.014292	0.015471	0.0085542	0.013712	0.05596	0.0096853	0.078342	0.036604	0.0098123	0.023603	0.045294	0.072309	0.12434	0.034979	0.0013256	0.043257	0.019913	0.1784	0.015866	0.40133	0.13319	0.41107	0.068644	0.03889	0.053221	0.25305	0.26168	0.26233	0.3039	0.2373	0.24317	0.27112	0.22836
60	0.0027061	0.0073716	0.018641	0.0091497	0.0056874	0.054699	0.090692	0.11105	0.013984	0.060332	0.14827	0.04163	0.10443	0.19207	0.01619	0.01943	0.016261	0.013517	0.0097968	0.017695	0.070007	0.019892	0.07716	0.046042	0.011817	0.030958	0.059296	0.10701	0.22157	0.10842	0.0031273	0.033443	0.027808	0.3128	0.027973	0.5924	0.1971	0.68258	0.099891	0.059432	0.070627	0.22859	0.26121	0.24909	0.26794	0.22988	0.21554	0.24442	0.20939
61	0.0024536	0.003578	0.0057226	0.0014434	0.0071944	0.13192	0.031942	0.17425	0.018166	0.03688	0.077653	0.020043	0.044075	0.15696	0.0092558	0.012563	0.01226	0.004436	0.0043119	0.0049241	0.031751	0.010695	0.029383	0.018061	0.01095	0.015278	0.033644	0.041342	0.12132	0.034836	0.0018927	0.11539	0.0072006	0.092992	0.013834	0.40805	0.092586	0.16252	0.040748	0.040254	0.018292	0.23989	0.26352	0.26797	0.26945	0.19653	0.18815	0.24749	0.20348
62	0.0028614	0.003519	0.0069929	0.0071766	0.0035233	0.087622	0.066294	0.22609	0.0065739	0.068898	0.10104	0.032651	0.055645	0.21277	0.020847	0.011043	0.006204	0.0040489	0.0030014	0.0074445	0.026279	0.010764	0.023894	0.017537	0.0066978	0.019335	0.038119	0.037856	0.15303	0.03989	0.0007429	0.032849	0.011871	0.15981	0.027902	0.29215	0.1503	0.18898	0.026505	0.020271	0.026656	0.20873	0.23626	0.21875	0.22986	0.20056	0.19462	0.22487	0.19392
63	0.0052952	0.0013561	0.012457	0.0066622	0.011743	0.076424	0.079352	0.1011	0.0048688	0.049944	0.091597	0.022356	0.064119	0.16502	0.0095071	0.015025	0.013198	0.010353	0.0071766	0.0091677	0.056918	0.0074688	0.054808	0.02646	0.0055417	0.029527	0.040292	0.068857	0.18654	0.085711	0.0021031	0.063909	0.020251	0.16815	0.016146	0.30529	0.12189	0.26918	0.030225	0.022251	0.018337	0.22033	0.23195	0.21891	0.23727	0.18743	0.19383	0.22519	0.18406
64	0.0033634	0.0076449	0.0083204	0.0021462	0.0088502	0.062351	0.037061	0.081105	0.0096431	0.020051	0.1536	0.013652	0.077275	0.093564	0.003997	0.018021	0.01252	0.005719	0.0037152	0.0014653	0.067915	0.013035	0.053312	0.03053	0.014821	0.017162	0.04036	0.066894	0.22068	0.057065	0.0010653	0.12111	0.021066	0.28994	0.015605	0.41112	0.11646	0.36793	0.092021	0.028371	0.04645	0.30837	0.30483	0.28898	0.33936	0.27349	0.27207	0.33165	0.28692
65	0.0089404	0.0041525	0.012529	0.0047655	0.026228	0.10616	0.054773	0.15618	0.011383	0.033038	0.15478	0.024938	0.080216	0.14563	0.01397	0.013342	0.015018	0.0086707	0.010562	0.01668	0.049657	0.015795	0.060173	0.02133	0.0098508	0.025335	0.046622	0.055875	0.20079	0.047586	0.0007982	0.091276	0.017083	0.24566	0.014494	0.45658	0.14936	0.42161	0.07421	0.043066	0.039148	0.26823	0.28637	0.26425	0.31024	0.22985	0.24425	0.27952	0.24344
66	0.003569	0.0012426	0.012222	0.0050338	0.0059117	0.053339	0.051409	0.14229	0.0059119	0.046645	0.11458	0.020587	0.059806	0.12015	0.010085	0.015492	0.010754	0.0094496	0.0064343	0.015398	0.039319	0.020553	0.044468	0.028944	0.011001	0.030867	0.039065	0.055591	0.14766	0.043156	0.0007507	0.044375	0.010895	0.19868	0.026808	0.34771	0.19955	0.44189	0.074306	0.027527	0.037984	0.1918	0.22987	0.20458	0.24076	0.17252	0.17845	0.22223	0.16982
67	0.0048765	0.0065443	0.021769	0.0071068	0.0050026	0.08536	0.090195	0.12596	0.01521	0.052835	0.13465	0.023392	0.086638	0.14552	0.029805	0.01947	0.027493	0.012248	0.015077	0.010294	0.076655	0.014986	0.075442	0.028853	0.0096179	0.033866	0.052383	0.062615	0.2119	0.078135	0.0040444	0.11029	0.017445	0.33917	0.04141	0.39339	0.14847	0.36397	0.069439	0.046533	0.042363	0.24724	0.24797	0.23006	0.28449	0.22187	0.21432	0.26589	0.21582
68	0.0056012	0.0049427	0.0099016	0.0055179	0.013994	0.081186	0.061243	0.17662	0.0099317	0.045427	0.17152	0.019131	0.060227	0.17852	0.018092	0.017376	0.017531	0.011987	0.013177	0.013586	0.080487	0.013841	0.07872	0.037197	0.013972	0.041711	0.062319	0.089105	0.32412	0.062876	0.000243	0.061145	0.033572	0.41943	0.015642	0.49884	0.18472	0.45783	0.085528	0.031444	0.0537	0.25699	0.27204	0.25195	0.28042	0.22637	0.24756	0.26306	0.23291
69	0.0050127	0.0045498	0.015269	0.0065424	0.010246	0.052456	0.066946	0.11784	0.011978	0.052524	0.13722	0.0093799	0.10313	0.1836	0.0088003	0.019034	0.018745	0.0077385	0.0075615	0.0035991	0.038956	0.016245	0.054261	0.032576	0.011467	0.025357	0.059373	0.061097	0.20087	0.042926	0.0022194	0.081371	0.011187	0.1682	0.016085	0.42065	0.1418	0.31926	0.12352	0.02413	0.042104	0.22843	0.23983	0.23942	0.25551	0.1977	0.20384	0.24302	0.20666
70	0.0043397	0.0043653	0.0063355	0.0083498	0.019568	0.10868	0.028625	0.19213	0.012187	0.053732	0.12208	0.031977	0.061712	0.16066	0.036802	0.0092103	0.0079408	0.0036062	0.0060415	0.021913	0.048278	0.019279	0.04002	0.021366	0.0074871	0.010029	0.035248	0.039407	0.18753	0.036847	0.0008912	0.13153	0.017249	0.25365	0.015538	0.40125	0.11546	0.23375	0.092443	0.06987	0.034666	0.25164	0.27264	0.26876	0.28499	0.2202	0.21159	0.25847	0.23044
71	0.0036582	0.0030833	0.0094158	0.0065918	0.0044341	0.064099	0.048579	0.12319	0.0054049	0.038884	0.15417	0.033651	0.084241	0.070714	0.024766	0.011235	0.020569	0.015583	0.012521	0.012272	0.051704	0.013638	0.059341	0.031763	0.01311	0.021817	0.046219	0.063309	0.16631	0.033095	0.0035155	0.039289	0.022323	0.30915	0.044834	0.53066	0.12149	0.60925	0.12274	0.030036	0.051251	0.23385	0.25579	0.23682	0.27347	0.20731	0.22168	0.25865	0.21174
72	0.0055315	0.0016747	0.012812	0.0072689	0.0061997	0.042988	0.065358	0.13233	0.0073247	0.038682	0.16004	0.028347	0.082585	0.22758	0.0077199	0.011731	0.012735	0.0081225	0.0081698	0.010783	0.057175	0.01116	0.072591	0.030296	0.0092483	0.02617	0.037807	0.057389	0.15145	0.061847	0.0002861	0.048023	0.023316	0.29496	0.016029	0.33895	0.17676	0.38718	0.066611	0.029634	0.062566	0.2555	0.28387	0.26203	0.28116	0.23426	0.2363	0.26211	0.228
73	0.0052608	0.0028892	0.012216	0.0068621	0.0054008	0.07707	0.037375	0.1017	0.012747	0.046406	0.11231	0.026602	0.10186	0.14525	0.015351	0.017843	0.010757	0.011701	0.0050368	0.0088573	0.059669	0.011122	0.072816	0.022215	0.012029	0.030052	0.04781	0.067128	0.13666	0.04951	0.0011914	0.053523	0.024688	0.23414	0.040161	0.33548	0.13178	0.27059	0.040581	0.027271	0.035428	0.2566	0.27068	0.26436	0.28419	0.21567	0.24103	0.266	0.2293
74	0.0052093	0.0058048	0.0084397	0.0056197	0.015081	0.056133	0.048697	0.18572	0.0082372	0.032062	0.072293	0.016724	0.040024	0.084332	0.018333	0.012296	0.010796	0.0031691	0.003392	0.0036801	0.046517	0.014949	0.054241	0.021775	0.0047695	0.011507	0.030883	0.052484	0.092668	0.056986	3.59e-05	0.16288	0.027232	0.16974	0.022807	0.30719	0.095708	0.28641	0.076439	0.045668	0.031855	0.26158	0.26485	0.25597	0.27225	0.22496	0.21916	0.25826	0.21891
75	0.0030094	0.0055783	0.019415	0.0062985	0.0091724	0.053512	0.027608	0.096747	0.007421	0.047634	0.11399	0.011709	0.093178	0.18707	0.0054126	0.01528	0.012475	0.0090334	0.01067	0.0051368	0.058719	0.0050895	0.06924	0.025436	0.024162	0.034091	0.057834	0.072671	0.13925	0.036079	0.0020813	0.066414	0.02646	0.15997	0.015231	0.4566	0.20142	0.22412	0.07076	0.025073	0.04773	0.20673	0.21355	0.2417	0.23478	0.20532	0.1952	0.22756	0.19393
76	0.003783	0.0017687	0.013739	0.0058749	0.012045	0.072629	0.062627	0.14833	0.007582	0.049489	0.059914	0.027138	0.041024	0.14022	0.020439	0.016095	0.012576	0.0031494	0.0047164	0.0055109	0.040756	0.0047402	0.051769	0.024462	0.009817	0.022425	0.033817	0.048839	0.15167	0.068287	0.0001268	0.051935	0.016142	0.14009	0.013488	0.29694	0.10925	0.15769	0.026427	0.023747	0.01073	0.21283	0.23553	0.23885	0.24604	0.19055	0.19971	0.23351	0.19492
77	0.0065067	0.0021667	0.014585	0.0044336	0.010624	0.081457	0.042063	0.15814	0.0062884	0.043757	0.091508	0.020068	0.050763	0.2572	0.0040573	0.013357	0.012184	0.0058565	0.0097577	0.0059039	0.02866	0.0057653	0.039975	0.017225	0.0072329	0.023088	0.046102	0.027943	0.2135	0.034912	0.0013698	0.088468	0.02752	0.16748	0.01748	0.31317	0.13133	0.21965	0.034923	0.01151	0.03327	0.24955	0.28289	0.26993	0.26037	0.21505	0.19165	0.25362	0.19897
78	0.0040645	0.0021843	0.0056735	0.0080878	0.019405	0.051592	0.042374	0.13595	0.0057953	0.030463	0.090174	0.014929	0.08996	0.14779	0.0052988	0.01807	0.012978	0.0085989	0.004381	0.0060927	0.063108	0.013235	0.072771	0.025729	0.014753	0.018406	0.03488	0.055478	0.17171	0.063605	0.0028648	0.077051	0.027878	0.22685	0.019981	0.35157	0.12536	0.36799	0.083142	0.031437	0.02912	0.23051	0.2598	0.24569	0.25805	0.20147	0.213	0.24427	0.2038
[truncated: 40 more columns]

## Sheet: Right side amygdala metrics
	Number of streamlines between the right named region and reft amygdala																																									Mean FA of streamlines between the right named region and right amygdala
ID	bankssts_ctx	caudalanteriorcingulate_ctx	caudalmiddlefrontal_ctx	cuneus_ctx	entorhinal_ctx	fusiform_ctx	inferiorparietal_ctx	inferiortemporal_ctx	isthmuscingulate_ctx	lateraloccipital_ctx	lateralorbitofrontal_ctx	lingual_ctx	medialorbitofrontal_ctx	middletemporal_ctx	parahippocampal_ctx	paracentral_ctx	parsopercularis_ctx	parsorbitalis_ctx	parstriangularis_ctx	pericalcarine_ctx	postcentral_ctx	posteriorcingulate_ctx	precentral_ctx	precuneus_ctx	rostralanteriorcingulate_ctx	rostralmiddlefrontal_ctx	superiorfrontal_ctx	superiorparietal_ctx	superiortemporal_ctx	supramarginal_ctx	frontalpole_ctx	temporalpole_ctx	transversetemporal_ctx	insula_ctx	cerebellar_hemisphere	thalamus	caudate	putamen	pallidum	hippocampus	accumbens	FA_bankssts_ctx	FA_caudalanteriorcingulate_ctx	FA_caudalmiddlefrontal_ctx	FA_cuneus_ctx	FA_entorhinal_ctx	FA_fusiform_ctx	FA_inferiorparietal_ctx	FA_inferiortemporal_ctx
1	0.0040961	0.0041813	0.011824	0.0044722	0.028732	0.086274	0.04233	0.10502	0.0055062	0.037983	0.081309	0.022436	0.044228	0.13801	0.0059653	0.0070461	0.0095172	0.0026003	0.0047048	0.0051619	0.041307	0.01237	0.033751	0.018662	0.01156	0.017844	0.057701	0.036005	0.10024	0.033551	0.0023993	0.055214	0.0047919	0.14483	0.034863	0.35453	0.12959	0.1595	0.032195	0.038432	0.01339	0.22717	0.26017	0.26754	0.24867	0.18556	0.2018	0.24032	0.19307
2	0.0039397	0.0027201	0.013825	0.0090482	0.025564	0.034196	0.059925	0.068089	0.007488	0.039501	0.084249	0.026714	0.059502	0.10325	0.012249	0.0070934	0.0109	0.0055143	0.0066957	0.0071958	0.042971	0.012741	0.048748	0.024508	0.013191	0.015412	0.051517	0.04136	0.1652	0.032746	0.0033971	0.054034	0.014611	0.19049	0.039131	0.43798	0.14018	0.37484	0.068481	0.035866	0.03915	0.22375	0.22599	0.23443	0.2607	0.18288	0.22496	0.24327	0.20663
3	0.0021328	0.0059172	0.012216	0.0090858	0.0065782	0.10973	0.053704	0.14456	0.020359	0.062687	0.094929	0.051342	0.030336	0.11562	0.020993	0.0088457	0.013235	0.0050813	0.0087442	0.0096296	0.035253	0.0082955	0.039213	0.023811	0.0048855	0.022648	0.036953	0.036123	0.11657	0.037851	0.0021147	0.03018	0.014983	0.20759	0.030898	0.37656	0.11236	0.2403	0.04678	0.049149	0.022192	0.21741	0.21807	0.23788	0.2466	0.17381	0.19611	0.23592	0.1875
4	0.0087273	0.0013213	0.011623	0.007187	0.0079127	0.08582	0.072032	0.097506	0.0089327	0.022736	0.085672	0.015857	0.05516	0.12073	0.011335	0.017342	0.0097962	0.0055139	0.0046464	0.0092951	0.05034	0.0071646	0.055586	0.027367	0.0078655	0.012896	0.044546	0.066678	0.24014	0.054708	0.0015592	0.040956	0.019277	0.11972	0.04384	0.35603	0.095272	0.26879	0.059815	0.034038	0.033417	0.23128	0.25767	0.25292	0.26392	0.18484	0.20223	0.24753	0.20433
5	0.0066612	0.0029784	0.016146	0.0029283	0.019204	0.12413	0.052846	0.10725	0.0086534	0.02064	0.096536	0.028056	0.035529	0.10937	0.011474	0.0063361	0.012105	0.006521	0.0091984	0.0040053	0.050546	0.013577	0.038643	0.019528	0.005664	0.019703	0.032065	0.03803	0.20444	0.046727	0.0021288	0.122	0.017716	0.15338	0.036464	0.32192	0.094683	0.24235	0.05123	0.032749	0.020232	0.24463	0.25304	0.24304	0.24339	0.206	0.21481	0.23178	0.20553
6	0.0001901	0.0013387	0.0038626	0.0044544	0.0053232	0.065064	0.026828	0.055725	0.0035438	0.0277	0.17974	0.011521	0.063322	0.091473	0.0075608	0.0035915	0.012199	0.010075	0.0045658	0.0022655	0.027238	0.0010191	0.016726	0.015631	0.030047	0.03173	0.019774	0.022822	0.17124	0.042177	0.0072341	0.034991	0.012206	0.059699	0.002913	0.1744	0.17584	0.067179	0.02107	0.02404	0.011787	0.23115	0.1805	0.19146	0.20644	0.15577	0.17422	0.20666	0.17602
7	0.0099415	0.0030536	0.010444	0.010924	0.0081804	0.036633	0.073588	0.058693	0.012657	0.040965	0.17233	0.021348	0.069732	0.10548	0.0046534	0.01194	0.012197	0.0068336	0.0064206	0.022952	0.061276	0.01095	0.042616	0.024433	0.01056	0.022439	0.033361	0.053151	0.1809	0.061079	0.0002737	0.06645	0.02072	0.2054	0.015925	0.34004	0.081228	0.32353	0.082725	0.041929	0.040311	0.25898	0.26392	0.25842	0.26872	0.20548	0.25152	0.25999	0.23756
8	0.010443	0.0073822	0.013791	0.0098105	0.0059241	0.032149	0.077527	0.10491	0.0048502	0.044185	0.13405	0.009419	0.031431	0.050719	0.0018574	0.012613	0.012171	0.0024505	0.0015123	0.0044112	0.051285	0.013993	0.079084	0.027372	0.0085758	0.027339	0.06181	0.026969	0.27161	0.1032	0.0027983	0.03179	0.037659	0.2456	0.024447	0.35876	0.17879	0.22086	0.041442	0.010765	0.023984	0.18638	0.2011	0.20535	0.18439	0.14065	0.13875	0.19537	0.14054
9	0.0029604	0.0012084	0.011426	0.012378	0.007916	0.045578	0.069551	0.046718	0.014894	0.042494	0.10109	0.034762	0.077702	0.13906	0.012643	0.016546	0.010039	0.0055194	0.0080374	0.0088257	0.075255	0.0072439	0.078042	0.035234	0.0081703	0.015952	0.044404	0.080586	0.17446	0.093226	0.0016096	0.13421	0.025941	0.13512	0.035676	0.39913	0.13258	0.33024	0.08788	0.042939	0.035021	0.23227	0.26148	0.25747	0.26346	0.20024	0.22402	0.24319	0.1978
10	0.010048	0.0026284	0.0073868	0.0082549	0.018215	0.065289	0.06506	0.075989	0.01517	0.037728	0.080998	0.018406	0.060514	0.17953	0.019784	0.011293	0.00702	0.0037217	0.0035648	0.008756	0.039444	0.0068433	0.050603	0.016849	0.0040844	0.012302	0.035349	0.043126	0.1354	0.038655	2.26e-05	0.056572	0.010422	0.095762	0.01832	0.3523	0.095312	0.19033	0.057036	0.049681	0.030186	0.27743	0.29363	0.28045	0.311	0.21718	0.23406	0.29811	0.23449
11	0.0076351	0.0032579	0.0079401	0.0085057	0.006385	0.08384	0.071253	0.083343	0.0082833	0.03792	0.23126	0.02436	0.14143	0.13386	0.012198	0.010314	0.0097193	0.015564	0.0075309	0.009385	0.061441	0.0096355	0.043207	0.017137	0.012603	0.043325	0.073671	0.033014	0.10351	0.049897	0.0059681	0.023446	0.020308	0.12388	0.022435	0.37318	0.13297	0.2527	0.056097	0.018395	0.038674	0.24026	0.27249	0.24558	0.26076	0.21614	0.21764	0.25107	0.20996
12	0.0098607	0.01167	0.012586	0.0082313	0.010962	0.073895	0.082793	0.091977	0.0078491	0.055049	0.071983	0.031035	0.030319	0.10547	0.0079258	0.010344	0.011322	0.0051427	0.0062272	0.012749	0.042836	0.028159	0.038566	0.021858	0.0058016	0.021659	0.040451	0.055746	0.22159	0.044082	0.0032391	0.086871	0.013238	0.13246	0.027784	0.36214	0.1285	0.27632	0.047872	0.054567	0.027016	0.24633	0.25329	0.24781	0.26961	0.20094	0.21332	0.25785	0.21423
13	0.0054188	0.0046266	0.01102	0.0092979	0.028242	0.053581	0.065187	0.13817	0.010352	0.074076	0.096092	0.028059	0.084363	0.13526	0.016908	0.015039	0.0079243	0.003093	0.0031372	0.0085432	0.056845	0.017192	0.068713	0.02215	0.019435	0.012941	0.051141	0.057203	0.12535	0.051834	0.0033346	0.10933	0.017365	0.088185	0.036415	0.52889	0.20098	0.51447	0.18807	0.051332	0.069235	0.27493	0.27649	0.27877	0.28459	0.23139	0.24243	0.27487	0.2157
14	0.014723	0.002194	0.013653	0.0086077	0.01292	0.03853	0.093023	0.10511	0.024487	0.04542	0.11209	0.021768	0.049824	0.15712	0.011581	0.016922	0.0093785	0.0055959	0.0074014	0.0083706	0.056595	0.016758	0.083606	0.025947	0.014767	0.017525	0.056696	0.065966	0.099784	0.057873	0.0001651	0.062807	0.016544	0.16084	0.025116	0.4604	0.18275	0.38073	0.10005	0.062989	0.04881	0.26936	0.28282	0.27884	0.28628	0.23026	0.24736	0.26995	0.24385
15	0.0054619	0.0028095	0.010878	0.0077321	0.0090026	0.04423	0.045407	0.074139	0.011949	0.031239	0.14181	0.020092	0.065706	0.095036	0.010592	0.011473	0.011253	0.0058224	0.0071036	0.016064	0.055861	0.017828	0.054116	0.018353	0.01044	0.016836	0.033215	0.046707	0.11061	0.040763	0.0013593	0.064724	0.022467	0.12831	0.025999	0.3685	0.14436	0.34577	0.094709	0.028936	0.046292	0.25043	0.26947	0.26894	0.28285	0.21335	0.23132	0.25781	0.22119
16	0.0057229	0.0035276	0.016309	0.011616	0.0050809	0.056518	0.086882	0.047526	0.0071383	0.054928	0.14084	0.041914	0.050196	0.044662	0.0068085	0.012769	0.0081305	0.0042355	0.0033126	0.022034	0.064071	0.010709	0.062357	0.033382	0.010382	0.01432	0.060186	0.062808	0.20892	0.070648	0.0013304	0.028866	0.038588	0.25303	0.038743	0.55821	0.15309	0.38116	0.062102	0.031411	0.039619	0.27528	0.29114	0.28906	0.29418	0.2421	0.24844	0.28041	0.25049
17	0.0075518	0.0013953	0.0098498	0.0073525	0.0065012	0.050809	0.066112	0.080748	0.015693	0.03099	0.12128	0.026116	0.049137	0.1403	0.012384	0.010511	0.0091672	0.0027184	0.0051466	0.0068423	0.056354	0.014449	0.043718	0.02051	0.0072291	0.013699	0.029789	0.043271	0.10981	0.049347	0.001273	0.05783	0.018307	0.14515	0.019402	0.34697	0.10804	0.19745	0.033814	0.055948	0.022774	0.24704	0.27949	0.27552	0.28936	0.20091	0.23459	0.27306	0.2107
18	0.0030787	0.00282	0.0096407	0.01611	0.020044	0.11376	0.065088	0.085535	0.023451	0.039034	0.10138	0.023202	0.047288	0.038239	0.020984	0.013091	0.0087518	0.0053169	0.005976	0.0055941	0.061043	0.009187	0.047771	0.028354	0.018283	0.020639	0.063868	0.076786	0.055025	0.063649	0.0008357	0.055461	0.010422	0.11943	0.025192	0.44613	0.16036	0.24918	0.043568	0.062895	0.029437	0.25351	0.25545	0.26725	0.28459	0.18691	0.20582	0.27025	0.21942
19	0.0077765	0.002552	0.014352	0.0078357	0.020311	0.051431	0.087281	0.094972	0.0069069	0.037089	0.14253	0.019252	0.058523	0.11339	0.0093807	0.0078852	0.010465	0.0084819	0.0084332	0.013488	0.054926	0.0052969	0.056915	0.015258	0.014153	0.023414	0.045158	0.059061	0.20508	0.056412	0.0027207	0.088007	0.033374	0.28476	0.027661	0.43713	0.13141	0.35823	0.086063	0.038069	0.034774	0.24	0.24146	0.23189	0.26096	0.20305	0.23248	0.25102	0.20733
20	0.019218	0.0033947	0.013937	0.011609	0.017363	0.049306	0.072251	0.13658	0.0080353	0.043933	0.06985	0.018335	0.058927	0.25051	0.022904	0.01024	0.0071339	0.0051812	0.0045648	0.0078889	0.038659	0.013043	0.039159	0.020285	0.011359	0.016042	0.032109	0.043316	0.14379	0.038372	0.0007431	0.086999	0.0090565	0.10216	0.016668	0.36305	0.11393	0.23363	0.07468	0.032555	0.033133	0.24843	0.27252	0.28099	0.26957	0.21572	0.22048	0.2582	0.21925
21	0.0031842	0.0029821	0.0062126	0.0090849	0.0029789	0.056093	0.053032	0.10909	0.0063976	0.038183	0.089117	0.022871	0.042804	0.11128	0.011931	0.0055203	0.0067813	0.003688	0.0048838	0.0067273	0.044757	0.0075096	0.022913	0.014617	0.013692	0.023482	0.036249	0.035004	0.072268	0.041246	0.0012837	0.010393	0.0078818	0.1314	0.018361	0.32018	0.12339	0.14497	0.036869	0.021002	0.019123	0.22958	0.2644	0.27997	0.2585	0.18742	0.20908	0.24374	0.19509
22	0.0061302	0.00072572	0.018787	0.0070902	0.00284	0.02552	0.057281	0.055956	0.015668	0.026736	0.073037	0.020001	0.027644	0.057437	0.0035903	0.013748	0.004903	0.0036516	0.0044791	0.0081955	0.054084	0.0059039	0.042266	0.018199	0.014411	0.016716	0.037713	0.038509	0.14078	0.057809	0.0027686	0.015441	0.01703	0.16512	0.021054	0.28228	0.10341	0.17183	0.023801	0.041397	0.010774	0.21375	0.23356	0.25045	0.24028	0.16743	0.19474	0.23461	0.18056
23	0.010858	0.0030485	0.018624	0.015616	0.0065905	0.1078	0.081385	0.095697	0.015012	0.049116	0.16581	0.036738	0.072885	0.10541	0.028653	0.010711	0.015164	0.0056391	0.0084011	0.014459	0.057747	0.01165	0.061839	0.029126	0.0062423	0.03191	0.046767	0.067144	0.10427	0.042989	0.0032614	0.040818	0.0042702	0.14025	0.05275	0.55938	0.20621	0.32931	0.10848	0.073923	0.054035	0.24686	0.25112	0.25499	0.25181	0.21233	0.19697	0.23635	0.20475
24	0.0024192	0.0027433	0.019649	0.0088637	0.010636	0.0517	0.039546	0.06073	0.010164	0.033333	0.070751	0.016481	0.039409	0.099381	0.0035712	0.0065121	0.0071536	0.0044644	0.0056998	0.01016	0.030152	0.015784	0.036957	0.020516	0.0075674	0.042681	0.032161	0.031365	0.08527	0.021057	0.000303	0.036902	0.0077472	0.077242	0.024153	0.30318	0.1277	0.21828	0.040827	0.032418	0.013212	0.21478	0.2231	0.24749	0.2352	0.18421	0.20992	0.23398	0.19689
25	0.0060163	0.0020358	0.010369	0.0073322	0.012414	0.064186	0.048607	0.079162	0.011009	0.039367	0.075851	0.025952	0.04054	0.086875	0.016277	0.010385	0.0048645	0.0057927	0.004159	0.014057	0.032127	0.0097793	0.034521	0.016758	0.0095169	0.0098061	0.026006	0.038305	0.10178	0.035889	0.0010996	0.089898	0.011246	0.10602	0.010658	0.34359	0.08834	0.22241	0.052717	0.034712	0.031846	0.28133	0.27724	0.27231	0.28885	0.22477	0.23698	0.28352	0.25189
26	0.010728	0.0061739	0.0051876	0.0091347	0.0053755	0.051902	0.043598	0.08404	0.019759	0.042293	0.098258	0.032635	0.046584	0.10158	0.0089267	0.0083544	0.0093277	0.0047699	0.0042514	0.015785	0.035232	0.016594	0.032769	0.019151	0.018737	0.019166	0.032029	0.039609	0.080654	0.037633	0.001859	0.058112	0.0034092	0.19156	0.02101	0.2799	0.089728	0.21915	0.044125	0.038923	0.02908	0.25595	0.28542	0.28081	0.28683	0.19585	0.21825	0.28176	0.21224
27	0.0034605	0.0048787	0.010735	0.0026935	0.0028602	0.1077	0.051091	0.079744	0.0079185	0.04719	0.10733	0.023959	0.059997	0.053595	0.012957	0.009406	0.011848	0.0060161	0.0088204	0.0054604	0.029082	0.0074283	0.040428	0.018393	0.010867	0.01499	0.037323	0.02879	0.07718	0.042103	0.0039303	0.022284	0.0081268	0.14263	0.030485	0.30883	0.095524	0.11863	0.02594	0.029906	0.019812	0.23569	0.24278	0.23795	0.24922	0.19006	0.20537	0.23452	0.20641
28	0.007727	0.002063	0.010377	0.008121	0.0091088	0.064505	0.051138	0.070321	0.0071394	0.023207	0.064407	0.018796	0.037557	0.087366	0.012635	0.0084007	0.014007	0.003051	0.0058089	0.0086115	0.033293	0.013038	0.039921	0.018738	0.010285	0.016844	0.032881	0.034487	0.095426	0.031307	0.0005081	0.015499	0.033884	0.10647	0.017196	0.30551	0.11898	0.15693	0.035117	0.020227	0.025944	0.26483	0.27315	0.25656	0.28682	0.20412	0.21012	0.26422	0.22797
29	0.0027743	0.00061146	0.012239	0.0026903	0.004602	0.054293	0.0328	0.065205	0.0020843	0.016678	0.093432	0.011871	0.054225	0.073548	0.012746	0.0027458	0.0075862	0.0086738	0.0080564	0.0070995	0.027403	0.0015001	0.024811	0.004689	0.012466	0.024257	0.025355	0.019786	0.10947	0.027048	0.0041033	0.040379	0.02442	0.18507	0.026265	0.31346	0.11152	0.16244	0.038581	0.02531	0.027165	0.20791	0.21485	0.22198	0.21948	0.17751	0.18889	0.21662	0.18538
30	0.0013134	0.0048802	0.0077197	0.011239	0.0025944	0.059203	0.047003	0.079964	0.0047987	0.037818	0.062251	0.019539	0.03512	0.045299	0.010889	0.0061535	0.0091306	0.0039112	0.0038706	0.0065414	0.038335	0.00687	0.033126	0.010813	0.010848	0.017105	0.031437	0.030756	0.077425	0.035357	0.0019295	0.023215	0.0076959	0.12269	0.016435	0.24499	0.091641	0.15704	0.026233	0.042642	0.016037	0.22316	0.23344	0.23637	0.26308	0.17316	0.20528	0.2379	0.19353
31	0.0081075	0.0041904	0.012065	0.0084571	0.0094434	0.085213	0.052108	0.10233	0.01313	0.05336	0.048352	0.031313	0.022664	0.10309	0.010575	0.0097637	0.0037916	0.002865	0.0033359	0.016462	0.024011	0.012623	0.032794	0.022098	0.010407	0.011512	0.036922	0.030745	0.10379	0.022889	0.0008613	0.074132	0.0060554	0.14801	0.023583	0.31101	0.10651	0.19567	0.041485	0.036874	0.036464	0.26376	0.28687	0.27515	0.28516	0.19702	0.22401	0.26977	0.21008
32	0.0088955	0.0035452	0.013688	0.010051	0.0098893	0.056581	0.05729	0.059651	0.012555	0.047502	0.066485	0.035308	0.024919	0.13511	0.009067	0.0096952	0.0086303	0.0034127	0.0046555	0.018086	0.03247	0.012042	0.04673	0.023237	0.010453	0.022124	0.042079	0.039815	0.10321	0.03073	0.001428	0.050718	0.0064974	0.2476	0.024456	0.34099	0.12431	0.24382	0.036578	0.035821	0.022416	0.25536	0.27411	0.27855	0.2843	0.194	0.22162	0.26624	0.21064
33	0.0056032	0.0016718	0.0097274	0.010931	0.0050587	0.10001	0.060853	0.15509	0.012535	0.044147	0.11573	0.020788	0.03614	0.12447	0.019315	0.010984	0.013772	0.0090892	0.0087836	0.010782	0.034402	0.015449	0.036973	0.017454	0.0080844	0.024892	0.02902	0.045982	0.20168	0.041994	0.0018459	0.11704	0.023653	0.15541	0.027648	0.34046	0.11014	0.24353	0.0631	0.057479	0.028681	0.26798	0.26687	0.25945	0.28927	0.20363	0.22573	0.27228	0.20882
34	0.010255	0.0058587	0.019424	0.0049072	0.01138	0.053118	0.060388	0.096966	0.0092772	0.039865	0.095152	0.01509	0.048649	0.19283	0.0073586	0.011184	0.014328	0.00507	0.0046673	0.0097322	0.035983	0.017173	0.05579	0.01344	0.016552	0.0143	0.048156	0.034269	0.1378	0.034396	0.0014872	0.11741	0.015392	0.1837	0.03294	0.3853	0.14502	0.31828	0.07483	0.041304	0.05007	0.28372	0.28825	0.29127	0.29871	0.21977	0.24094	0.28873	0.2455
35	0.0060958	0.0048664	0.016393	0.0042111	0.0038296	0.033523	0.060557	0.082786	0.0073703	0.022316	0.15848	0.017612	0.070204	0.13462	0.011565	0.0095067	0.011728	0.0098249	0.0059458	0.0037332	0.041887	0.010106	0.050379	0.023551	0.01678	0.026887	0.032424	0.054643	0.15141	0.042895	0.0012065	0.03846	0.012847	0.14273	0.022798	0.28882	0.17301	0.1605	0.030285	0.013258	0.025167	0.21921	0.22048	0.24318	0.2239	0.19162	0.20272	0.22277	0.20281
36	0.0035866	0.0041857	0.016808	0.0085664	0.0091585	0.087826	0.053345	0.075972	0.01288	0.038075	0.14735	0.027489	0.054316	0.078782	0.0092531	0.0076864	0.012299	0.0079988	0.016265	0.011763	0.040576	0.019723	0.047954	0.015119	0.015607	0.031431	0.041676	0.037046	0.1405	0.028118	0.0024218	0.14398	0.013231	0.17057	0.037686	0.33001	0.16258	0.32179	0.061861	0.046058	0.048235	0.25606	0.25022	0.25588	0.27389	0.20172	0.23004	0.25376	0.22034
37	0.010363	0.0018097	0.014307	0.01219	0.0038195	0.034814	0.053752	0.11144	0.010079	0.048622	0.13935	0.016962	0.086422	0.18756	0.0085395	0.01241	0.011979	0.0074831	0.0053813	0.0091389	0.054309	0.0065342	0.072135	0.025471	0.012415	0.014685	0.049274	0.058289	0.17737	0.05108	0.0041421	0.050435	0.012022	0.16813	0.015536	0.31823	0.16318	0.24984	0.071775	0.027641	0.053445	0.26093	0.26742	0.28064	0.28773	0.2284	0.23659	0.26911	0.21769
38	0.016983	0.0032215	0.022531	0.016255	0.011489	0.035703	0.067288	0.040777	0.0097703	0.025359	0.13772	0.019429	0.059191	0.10059	0.011849	0.010552	0.012618	0.0069824	0.0048053	0.0030526	0.052835	0.024272	0.069309	0.031414	0.0048911	0.027752	0.056573	0.051851	0.082416	0.057166	0.0002057	0.060758	0.016671	0.18006	0.014145	0.41347	0.21651	0.3796	0.068576	0.035044	0.02619	0.27021	0.28956	0.2902	0.30815	0.22902	0.25401	0.28438	0.25393
39	0.0069012	0.002547	0.012749	0.0085272	0.0084604	0.090655	0.052515	0.1016	0.012338	0.044737	0.093119	0.028223	0.043535	0.10268	0.0061344	0.0095765	0.0085068	0.0064266	0.0057877	0.0099954	0.045325	0.0075109	0.045167	0.022688	0.0072252	0.020449	0.050236	0.061015	0.067512	0.031652	0.0029272	0.047964	0.010959	0.13865	0.021756	0.43747	0.13247	0.33351	0.082137	0.045287	0.027303	0.27256	0.27454	0.27984	0.27457	0.23059	0.22533	0.25731	0.22813
40	0.0093926	0.0037697	0.0083784	0.0088284	0.012579	0.066521	0.080778	0.11775	0.012061	0.048023	0.074325	0.03139	0.040298	0.10314	0.0089481	0.007726	0.0042382	0.0039218	0.0053871	0.011013	0.029877	0.0087593	0.034256	0.027887	0.010403	0.019914	0.029308	0.043854	0.06277	0.04573	0.0002076	0.073214	0.0082744	0.14038	0.022976	0.43862	0.15312	0.30459	0.034716	0.032491	0.022873	0.25139	0.26873	0.28408	0.26408	0.2224	0.2199	0.26547	0.21828
41	0.0059363	0.010527	0.011969	0.0058088	0.0038787	0.046512	0.048803	0.088075	0.0094747	0.029352	0.10208	0.016177	0.032117	0.059071	0.0085012	0.0086651	0.011041	0.0048393	0.0053726	0.0047537	0.031065	0.012874	0.050088	0.018948	0.009716	0.038298	0.042782	0.03879	0.05169	0.033575	0.002261	0.039209	0.0056057	0.139	0.02671	0.26823	0.11134	0.21321	0.037157	0.021933	0.02238	0.25655	0.24568	0.25163	0.26776	0.2115	0.22416	0.25361	0.21503
42	0.0052894	0.0052238	0.017219	0.0059549	0.0015369	0.066845	0.054878	0.075301	0.011991	0.031274	0.17705	0.020716	0.055183	0.089818	0.0065689	0.0095959	0.011275	0.0047572	0.0089746	0.0099275	0.037523	0.0096183	0.046694	0.019568	0.0068499	0.038034	0.050919	0.048269	0.078835	0.049727	0.003933	0.028885	0.0076541	0.14337	0.039359	0.32463	0.11753	0.22303	0.027852	0.022567	0.015645	0.26382	0.26791	0.26091	0.27791	0.20068	0.2308	0.25541	0.20365
43	0.0045065	0.0037311	0.010161	0.0073139	0.003328	0.043751	0.053565	0.048669	0.008562	0.040637	0.077834	0.014535	0.047339	0.079895	0.0086982	0.011636	0.0064897	0.0039998	0.0057414	0.0064861	0.044792	0.0098234	0.050099	0.019769	0.0069429	0.017219	0.045412	0.057253	0.15518	0.041599	0.0030765	0.09822	0.01615	0.092249	0.021221	0.35224	0.090535	0.17207	0.04465	0.03222	0.031459	0.24533	0.2629	0.25302	0.26729	0.20466	0.23396	0.24895	0.21582
44	0.0052146	0.0033439	0.012813	0.0085806	0.0047264	0.051092	0.062088	0.14466	0.0086261	0.037034	0.17741	0.02074	0.045156	0.080162	0.010288	0.010339	0.025535	0.011801	0.010116	0.011641	0.042378	0.018175	0.055589	0.023571	0.019363	0.039084	0.059111	0.045235	0.13984	0.040299	0.0043063	0.018828	0.011236	0.34653	0.011785	0.28206	0.16496	0.25971	0.042652	0.031218	0.021678	0.21732	0.24554	0.21383	0.25009	0.17315	0.18909	0.22586	0.1791
45	0.0071475	0.0040512	0.013494	0.0089192	0.010507	0.065439	0.052921	0.077856	0.0074627	0.044691	0.12074	0.03166	0.036462	0.047491	0.0041422	0.0063216	0.01326	0.0066865	0.007944	0.0073789	0.036333	0.020048	0.026946	0.019265	0.0052344	0.029348	0.044429	0.041661	0.076596	0.042488	0.0032995	0.053348	0.0046467	0.22596	0.031925	0.34581	0.12147	0.19925	0.029096	0.036563	0.018837	0.23705	0.23175	0.21943	0.25515	0.16888	0.2037	0.2393	0.19526
46	0.005685	0.0068713	0.0085882	0.011012	0.0081576	0.058082	0.069107	0.11986	0.014538	0.031719	0.050709	0.021626	0.031228	0.1203	0.015031	0.0077818	0.0083246	0.0035643	0.0061825	0.017387	0.045476	0.017399	0.038214	0.012584	0.0079933	0.024141	0.022688	0.052728	0.1399	0.055788	0.0005828	0.096866	0.027652	0.12167	0.024611	0.34098	0.15336	0.2594	0.065283	0.02954	0.021816	0.23842	0.23149	0.2432	0.2561	0.18916	0.20392	0.24055	0.2046
47	0.002193	0.0032608	0.0078277	0.0050941	0.0085733	0.058322	0.040687	0.07973	0.015888	0.036595	0.089084	0.020348	0.02837	0.06893	0.012363	0.0088946	0.013338	0.0079106	0.015048	0.01772	0.028834	0.0067775	0.029876	0.019178	0.0075962	0.032832	0.045285	0.039413	0.051221	0.022662	0.004352	0.063753	0.0083883	0.16506	0.016741	0.25378	0.079453	0.18255	0.029033	0.04183	0.014418	0.24768	0.23088	0.23955	0.26857	0.17821	0.21691	0.25297	0.19604
48	0.010082	0.0042207	0.011296	0.0095332	0.014762	0.065488	0.094322	0.10704	0.0091707	0.048225	0.12014	0.029014	0.053562	0.11594	0.0055355	0.014533	0.013537	0.0049152	0.0057562	0.013447	0.071486	0.01223	0.067869	0.048893	0.011023	0.020428	0.047037	0.064696	0.12761	0.071033	0.0037568	0.09453	0.013192	0.13203	0.045432	0.52164	0.17153	0.28362	0.08728	0.0315	0.056079	0.22916	0.24624	0.24026	0.24945	0.19116	0.21594	0.25178	0.21316
49	0.0073229	0.0021279	0.027662	0.0090291	0.022808	0.089013	0.072009	0.088674	0.0083954	0.028144	0.14047	0.0149	0.063606	0.083726	0.015488	0.012581	0.011326	0.008049	0.01028	0.0053728	0.043598	0.012207	0.066944	0.035967	0.024482	0.029824	0.065152	0.055544	0.24145	0.058253	0.0012684	0.15145	0.0065153	0.14097	0.045171	0.58262	0.1762	0.34902	0.053748	0.061283	0.029803	0.22971	0.24086	0.25156	0.25806	0.1681	0.19132	0.2439	0.18909
50	0.0095646	0.0072969	0.012328	0.010186	0.01721	0.12786	0.10603	0.12931	0.012389	0.044114	0.094272	0.021265	0.055423	0.16945	0.0080498	0.009678	0.0056996	0.0051868	0.0037046	0.0072277	0.047009	0.022707	0.06676	0.034567	0.0078688	0.01638	0.051891	0.064095	0.11535	0.046332	0.0022208	0.077023	0.01058	0.13692	0.0303	0.40064	0.12082	0.28617	0.048123	0.04866	0.029808	0.27676	0.31874	0.30438	0.29157	0.2155	0.21792	0.28054	0.21787
51	0.0072963	0.0021403	0.013486	0.010194	0.023089	0.13837	0.043804	0.096649	0.017089	0.030491	0.13819	0.030137	0.051538	0.11712	0.024245	0.010829	0.014352	0.0098143	0.0089602	0.019031	0.048168	0.015192	0.048721	0.018466	0.010672	0.027948	0.05597	0.045833	0.097056	0.037572	0.0037396	0.18576	0.013795	0.14443	0.04592	0.5008	0.15415	0.41472	0.11411	0.03343	0.055737	0.28106	0.27967	0.29679	0.28675	0.22079	0.22787	0.2779	0.23093
52	0.0026301	0.0045231	0.010583	0.0082768	0.019528	0.0564	0.046108	0.058541	0.0050899	0.034159	0.070514	0.021957	0.040232	0.066228	0.012875	0.013178	0.010845	0.0039963	0.0058253	0.0062077	0.034007	0.0068332	0.031079	0.021896	0.022001	0.021561	0.042486	0.061782	0.078275	0.03487	0.0018257	0.096836	0.005038	0.10912	0.025873	0.41049	0.13045	0.19166	0.042556	0.037637	0.024551	0.26421	0.2862	0.28832	0.28243	0.2096	0.21736	0.27433	0.22284
53	0.0059367	0.0043567	0.0071264	0.013135	0.014216	0.055219	0.058192	0.073334	0.010265	0.033966	0.077789	0.022117	0.050402	0.13056	0.008712	0.011164	0.0053872	0.0028108	0.0014543	0.013301	0.0433	0.01031	0.031831	0.015297	0.0093054	0.0096326	0.034524	0.035926	0.069897	0.036321	0.0002106	0.13243	0.0058228	0.078496	0.023994	0.40289	0.10596	0.19546	0.048516	0.032103	0.035517	0.26075	0.28922	0.28125	0.27846	0.20911	0.23503	0.27264	0.22533
54	0.011831	0.004661	0.0071871	0.009606	0.0054764	0.053741	0.06552	0.11758	0.010046	0.046697	0.117	0.023486	0.07712	0.20935	0.0075833	0.010718	0.0090691	0.0041073	0.0087031	0.011607	0.041642	0.0093811	0.060184	0.022331	0.016991	0.016618	0.046811	0.047359	0.17041	0.041972	0.0011071	0.035731	0.018443	0.17002	0.024808	0.35502	0.1121	0.22148	0.054982	0.032949	0.048946	0.22835	0.27524	0.26201	0.25925	0.22256	0.22527	0.24989	0.20257
55	0.008915	0.0048997	0.007925	0.010161	0.0042392	0.073653	0.040184	0.12392	0.021476	0.03555	0.11351	0.032828	0.058055	0.13635	0.013879	0.010289	0.0075517	0.0047106	0.0054877	0.012251	0.031103	0.010389	0.034075	0.019804	0.015617	0.020277	0.033958	0.034111	0.13921	0.02755	0.000684	0.043366	0.0093177	0.1337	0.030504	0.38996	0.13501	0.22418	0.03888	0.049903	0.025216	0.27311	0.28966	0.29926	0.30062	0.23749	0.24636	0.29001	0.24079
56	0.0074013	0.0059164	0.0099272	0.014222	0.0040547	0.050281	0.071744	0.08786	0.012435	0.061225	0.12553	0.040411	0.061359	0.12046	0.0089762	0.011912	0.0072643	0.0029461	0.0038925	0.011113	0.04736	0.01427	0.062473	0.021623	0.013457	0.010998	0.041935	0.050826	0.1307	0.042304	0.0007716	0.037738	0.011881	0.1596	0.030431	0.47821	0.14373	0.40961	0.11636	0.032565	0.041373	0.27486	0.29632	0.29054	0.3052	0.22752	0.2555	0.27625	0.24611
57	0.0036585	0.0053663	0.015484	0.010866	0.010126	0.070708	0.054436	0.1089	0.016172	0.036591	0.099595	0.020148	0.051655	0.082571	0.020993	0.010736	0.0079145	0.0045742	0.0037595	0.0097767	0.05365	0.010878	0.048462	0.019816	0.015544	0.020144	0.040194	0.046475	0.1508	0.039085	0	0.062693	0.012384	0.1665	0.014831	0.31844	0.12218	0.28018	0.057369	0.049452	0.025749	0.23067	0.2444	0.23408	0.26484	0.17253	0.2103	0.23737	0.19229
58	0.0056682	0.0023017	0.012727	0.014628	0.0073578	0.057132	0.068973	0.077105	0.011851	0.026929	0.11222	0.020363	0.041168	0.10475	0.0079605	0.011864	0.012397	0.0046703	0.0052933	0.010017	0.037998	0.013567	0.050721	0.021492	0.0086913	0.021847	0.031622	0.057502	0.14463	0.039156	0.0021432	0.044952	0.010906	0.14993	0.016932	0.41332	0.13145	0.23979	0.09672	0.024936	0.047753	0.22797	0.24259	0.23982	0.26052	0.18814	0.2225	0.24377	0.20123
59	0.0023846	0.0034795	0.016037	0.022255	0.0066443	0.027428	0.063521	0.08449	0.017251	0.041846	0.14618	0.024796	0.074612	0.11642	0.0059508	0.020033	0.006373	0.0058843	0.0071261	0.012372	0.041243	0.016235	0.064976	0.028916	0.0084407	0.021681	0.043454	0.05615	0.14058	0.033794	0.0010171	0.075709	0.012935	0.13319	0.038987	0.52706	0.14138	0.29765	0.088709	0.032013	0.046063	0.26994	0.28258	0.26738	0.30765	0.21961	0.25936	0.28021	0.22842
60	0.013335	0.006802	0.022357	0.019926	0.0086993	0.061703	0.09779	0.10051	0.016177	0.056338	0.18771	0.035792	0.06534	0.12896	0.028743	0.013057	0.014654	0.01329	0.0087856	0.024074	0.059423	0.028194	0.074528	0.033226	0.020711	0.055152	0.071302	0.084073	0.13522	0.049968	0.0025729	0.078197	0.025022	0.17964	0.037717	0.58189	0.21864	0.4904	0.077969	0.071572	0.051626	0.24972	0.27666	0.25147	0.2765	0.21107	0.22008	0.26085	0.22018
61	0.0090315	0.0052681	0.0077958	0.0026057	0.0033261	0.071947	0.042536	0.099193	0.004596	0.033045	0.088107	0.021692	0.032167	0.099732	0.0091046	0.0092077	0.0086865	0.0036147	0.0051391	0.0047006	0.037512	0.0064126	0.025855	0.017186	0.0089926	0.018962	0.041508	0.034824	0.10914	0.043574	0.0017989	0.046242	0.0074612	0.097483	0.013125	0.25659	0.10337	0.17501	0.019471	0.03701	0.014927	0.25002	0.27382	0.27302	0.26175	0.18384	0.20926	0.25428	0.19041
62	0.003389	0.0022784	0.01063	0.0092857	0.0070095	0.074652	0.069142	0.064905	0.017807	0.040362	0.17286	0.037021	0.054447	0.047308	0.0090384	0.0056833	0.011485	0.01382	0.010999	0.011118	0.042149	0.0066859	0.03222	0.020165	0.003841	0.02724	0.04944	0.037296	0.11196	0.047325	0.0053021	0.037927	0.0098096	0.28215	0.029103	0.32887	0.085865	0.29247	0.036064	0.034225	0.025193	0.22909	0.23682	0.2292	0.24198	0.18558	0.20236	0.23596	0.20636
63	0.0080185	0.0066254	0.02415	0.015965	0.0098647	0.091514	0.087604	0.12117	0.0091468	0.071369	0.12512	0.026493	0.045816	0.11622	0.022007	0.010193	0.012559	0.0082305	0.0095777	0.014611	0.045161	0.0049038	0.048864	0.015948	0.0098478	0.032316	0.051275	0.040599	0.15856	0.071633	0.0005977	0.05681	0.01253	0.1758	0.017498	0.31312	0.13725	0.25551	0.030333	0.036609	0.03289	0.20582	0.24361	0.24147	0.22205	0.18081	0.18801	0.21919	0.17308
64	0.0037057	0.0066223	0.007125	0.007097	0.01398	0.057709	0.043238	0.101	0.0047884	0.037831	0.12312	0.026031	0.059851	0.081544	0.00342	0.012395	0.0051501	0.0030955	0.0029087	0.015889	0.04784	0.019298	0.041137	0.022453	0.013195	0.0092746	0.034736	0.051077	0.17737	0.047908	0.0007089	0.23923	0.012032	0.15304	0.021662	0.38709	0.10935	0.26575	0.074585	0.015384	0.051665	0.31679	0.32339	0.29639	0.32824	0.24436	0.26357	0.32608	0.2491
65	0.0064837	0.0059377	0.01458	0.0066651	0.014164	0.064222	0.044356	0.12419	0.0095964	0.028755	0.14624	0.018263	0.058913	0.11343	0.0087898	0.0097353	0.0069041	0.0049003	0.0044664	0.023314	0.031358	0.016565	0.059449	0.016314	0.011949	0.018686	0.054624	0.035502	0.12564	0.027292	0.0015848	0.072494	0.0077915	0.19467	0.019472	0.47678	0.16369	0.35103	0.055165	0.032377	0.041538	0.27494	0.30804	0.28426	0.30403	0.23739	0.24319	0.27912	0.24032
66	0.0037904	0.0028041	0.0095671	0.0065556	0.0097404	0.04909	0.048682	0.092937	0.0032353	0.044045	0.076525	0.015628	0.02727	0.083518	0.0054018	0.0070936	0.007441	0.0028237	0.0038083	0.0078794	0.026688	0.012903	0.026108	0.016737	0.0057563	0.017108	0.026215	0.036905	0.10386	0.026634	0.0025468	0.053462	0.0086791	0.14077	0.021124	0.20799	0.088694	0.15499	0.039544	0.022735	0.013152	0.22106	0.23341	0.204	0.23566	0.16452	0.17402	0.21876	0.1685
67	0.0050999	0.0028575	0.0068665	0.0087229	0.0098838	0.071255	0.051545	0.14776	0.0092601	0.049358	0.11503	0.024559	0.050208	0.12338	0.024847	0.010972	0.012509	0.0041487	0.0039942	0.010478	0.056132	0.010422	0.036916	0.017885	0.012517	0.019276	0.0334	0.03562	0.1601	0.031801	0.0007837	0.10272	0.0068604	0.14687	0.036539	0.39737	0.13963	0.2159	0.045915	0.065168	0.029519	0.25246	0.26351	0.2614	0.28669	0.1958	0.22172	0.27061	0.21496
68	0.0073254	0.0058028	0.0084563	0.0088344	0.0028583	0.055007	0.073581	0.077498	0.0099221	0.034373	0.1997	0.042255	0.063566	0.17706	0.017034	0.0088735	0.0077391	0.0083523	0.0050505	0.0069585	0.045096	0.012177	0.054144	0.023113	0.012372	0.025894	0.047618	0.04616	0.17908	0.047353	0.0027096	0.032169	0.024258	0.20478	0.020275	0.3572	0.14568	0.23672	0.047732	0.032697	0.030448	0.26184	0.28767	0.27575	0.28684	0.24532	0.2443	0.27216	0.23668
69	0.011856	0.0061949	0.012041	0.013472	0.0073285	0.10164	0.093327	0.14416	0.013596	0.042971	0.058326	0.01786	0.045081	0.24283	0.023081	0.019909	0.010343	0.0029341	0.0032855	0.013186	0.058281	0.016629	0.068294	0.024412	0.011723	0.013534	0.037215	0.044276	0.18879	0.051573	0.0016103	0.046472	0.020809	0.13251	0.03182	0.36709	0.10029	0.23006	0.074835	0.063168	0.04052	0.24051	0.27985	0.26433	0.25875	0.1897	0.19119	0.24669	0.19161
70	0.0063407	0.0032935	0.0088139	0.0091194	0.018557	0.062019	0.048915	0.092389	0.0094126	0.031142	0.09422	0.02318	0.052341	0.088947	0.024785	0.0062652	0.0049298	0.0053752	0.0034397	0.015209	0.044443	0.016192	0.026707	0.012462	0.010035	0.0082179	0.02406	0.038399	0.14078	0.041532	0.00163	0.087923	0.015056	0.20442	0.016306	0.39184	0.095928	0.23725	0.071555	0.070076	0.054386	0.28385	0.27413	0.24967	0.30211	0.22	0.23949	0.28388	0.24829
71	0.0044168	0.001211	0.0076535	0.0063407	0.0081099	0.043127	0.035158	0.074176	0.008528	0.021618	0.11339	0.015083	0.024305	0.087154	0.0085267	0.014342	0.0087215	0.0067926	0.0071967	0.019692	0.034572	0.0068596	0.057499	0.015726	0.0044413	0.014403	0.039354	0.030961	0.11464	0.030883	0.0017912	0.040613	0.0094245	0.17618	0.018599	0.40546	0.13046	0.22422	0.047695	0.017336	0.024919	0.23168	0.26741	0.27458	0.28876	0.1955	0.22865	0.26267	0.21442
72	0.0048205	0.0035391	0.0088714	0.0061136	0.022118	0.058808	0.052144	0.12971	0.010122	0.032344	0.086638	0.019634	0.047708	0.086968	0.004066	0.008138	0.0086731	0.0034785	0.004662	0.011599	0.030395	0.010188	0.054972	0.013574	0.012977	0.012079	0.030636	0.033306	0.11358	0.038251	0.0009998	0.097081	0.011903	0.11882	0.029857	0.42101	0.13715	0.26939	0.051349	0.043015	0.040991	0.26241	0.27161	0.26529	0.28303	0.21279	0.22851	0.26422	0.2261
73	0.0034838	0.004795	0.0089382	0.0055171	0.01174	0.04167	0.038737	0.081759	0.012311	0.033066	0.098029	0.01938	0.06214	0.097247	0.0088267	0.014237	0.0071389	0.0057516	0.0048176	0.010585	0.048899	0.0097477	0.058257	0.022068	0.012657	0.018615	0.033438	0.04982	0.10868	0.041476	0.0017498	0.025655	0.022042	0.19302	0.024324	0.31315	0.10486	0.20591	0.034932	0.017091	0.03499	0.26223	0.26334	0.25047	0.2818	0.21328	0.24214	0.26571	0.21957
74	0.0045061	0.0024473	0.0089565	0.0089815	0.03288	0.08541	0.056792	0.12219	0.022364	0.032837	0.056712	0.031007	0.026873	0.1286	0.0165	0.010189	0.0079818	0.0031235	0.0049892	0.012257	0.05763	0.019722	0.055392	0.029164	0.0039352	0.0092454	0.041605	0.062811	0.13939	0.055146	0.0014739	0.16905	0.014515	0.12466	0.033358	0.36781	0.1034	0.31347	0.092808	0.087628	0.025011	0.24336	0.25155	0.25294	0.2688	0.20147	0.2168	0.25861	0.19592
75	0.0034948	0.0020451	0.010602	0.0079478	0.016535	0.046228	0.037382	0.051313	0.0060366	0.036513	0.10943	0.016782	0.054122	0.089729	0.011617	0.011041	0.0069961	0.0052231	0.0036621	0.0075318	0.032333	0.0091249	0.046361	0.0099152	0.021602	0.017419	0.042483	0.033615	0.12738	0.028418	0.0044818	0.052956	0.0075144	0.072285	0.03476	0.33526	0.13242	0.14957	0.071923	0.031238	0.03168	0.24716	0.25323	0.25883	0.25938	0.18999	0.20702	0.24845	0.19549
76	0.0038221	0.0028117	0.024823	0.0056274	0.022534	0.06985	0.057199	0.053108	0.0070549	0.047806	0.088128	0.027934	0.023644	0.12126	0.012577	0.0082707	0.013729	0.0071326	0.0073463	0.0067163	0.038209	0.0088837	0.048601	0.019263	0.0054228	0.02429	0.034958	0.032082	0.19958	0.049636	0.0004485	0.11194	0.025217	0.1244	0.026083	0.3188	0.11232	0.18733	0.039126	0.022505	0.013033	0.23504	0.21494	0.26463	0.25361	0.19436	0.20152	0.23927	0.20488
77	0.0017764	0.0016005	0.018123	0.0031774	0.026258	0.096173	0.039659	0.084861	0.0030647	0.028565	0.097333	0.017516	0.028029	0.075809	0.01761	0.0081248	0.013081	0.0067856	0.0097376	0.0038727	0.035347	0.0059556	0.049392	0.013166	0.0060873	0.023035	0.039638	0.030157	0.10243	0.030391	0.0037191	0.080018	0.007702	0.11489	0.034879	0.30108	0.16778	0.22343	0.046967	0.027842	0.025499	0.25318	0.25237	0.28367	0.26167	0.21351	0.21587	0.25947	0.2166
78	0.0063057	0.0067622	0.010946	0.00948	0.0098634	0.051018	0.10533	0.12145	0.0073067	0.041639	0.077171	0.014822	0.04545	0.12857	0.010368	0.0093456	0.0080932	0.0026794	0.0035775	0.0072205	0.04877	0.01893	0.046872	0.027281	0.012731	0.016908	0.032654	0.054218	0.098282	0.044848	5.8e-05	0.063599	0.0078086	0.12642	0.012574	0.37823	0.14082	0.34339	0.063472	0.020584	0.027647	0.22328	0.27817	0.24244	0.26101	0.19556	0.20689	0.2482	0.20258
[truncated: 40 more columns]
