# Supplementary material for: Maternal cortisol is associated with neonatal amygdala microstructure and connectivity in a sexually dimorphic manner
Source: eLife. 2020 Nov 24;9:e60729. doi: 10.7554/eLife.60729 (PMC7685701; doi:10.7554/eLife.60729)
Supplement: Supplementary file 1. [file elife-60729-supp1.xlsx]

## Sheet: Supplementary Table 1
S		Age at MRI	GA at birth	Birth weight	SIMD 2016 quintile	Infant ethnicity	Infant sex	Maternal parity	Maternal BMI	Maternal age
				z-score
Left	Volume	-0.077	0.237*	-0.136	-0.03	0.176	0.01	-0.034	-0.156	-0.052
	FA	0.462**	0.423**	0.117	0.251*	0.102	0.113	-0.116	-0.138	0.039
	MD	-0.616**	-0.413**	-0.102	-0.271*	-0.066	-0.102	0.061	0.02	-0.177
	ODI	-0.2	-0.296**	-0.18	-0.141	-0.058	-0.068	0.187	0.073	0.017
	NDI	0.721**	0.431**	0.194	0.263*	0.118	0.134	-0.072	0.008	0.135
Right	Volume	-0.201	0.104	-0.298**	-0.189	-0.029	-0.093	-0.131	-0.054	-0.131
	FA	0.453**	0.430**	0.298**	0.203	0.161	0.163	-0.125	0.021	0.034
	MD	-0.643**	-0.543**	-0.237*	-0.239*	-0.145	-0.081	0.046	0.029	-0.16
	ODI	-0.275*	-0.418**	-0.263*	-0.094	-0.196	-0.076	0.163	-0.018	-0.029
	NDI	0.738**	0.449**	0.21	0.228*	0.118	0.15	0.014	0.028	0.149
Pearson Correlation coefficients. p<0.05*, p<0.01**
Abbreviations: FA, fractional anisotropy; MD, mean diffusivity; ODI, orientation dispersion index; NDI, neurite density index; GA, gestational age; SIMD2016, Scottish Index of Multiple Deprivation 2016.
Coding: Antenatal steroids (mother received antenatal steroids for threatened preterm birth=1, mother did not receive antenatal steroids=0), infant ethnicity (European ancestry=0, other=1), infant sex (male=0 female=1), maternal parity (primiparous=0, multiparous=1)
