# Supplementary material for: Maternal cortisol is associated with neonatal amygdala microstructure and connectivity in a sexually dimorphic manner
Source: eLife. 2020 Nov 24;9:e60729. doi: 10.7554/eLife.60729 (PMC7685701; doi:10.7554/eLife.60729)
Supplement: Supplementary file 2. [file elife-60729-supp2.xlsx]

## Sheet: Supplementary File 2
Region of interest	Left amygdala streamline count	Right amygdala streamline count
Thalamus	0.3901	0.37125
Putamen	0.30961	0.25621
Insula	0.18792	0.15373
Superior temporal gyrus	0.1556	0.1309
Inferior temporal gyrus	0.14379	0.09229
Middle temporal gyrus	0.14303	0.10985
Caudate	0.13979	0.13124
Lateral orbitofrontal cortex	0.10408	0.11001
Temporal pole	0.07476	0.06859
Fusiform gyrus	0.07261	0.06533
Pallidum	0.06616	0.05741
Medial orbitofrontal cortex	0.06413	0.05036
Superior parietal cortex	0.05621	0.04571
Precentral gyrus	0.0537	0.04776
Supramarginal gyrus	0.05308	0.04392
Inferior parietal cortex	0.05262	0.06055
Postcentral gyrus	0.05062	0.04391
Superior frontal gyrus	0.04645	0.04191
Lateral occipital cortex	0.04189	0.03917
Accumbens	0.03646	0.03166
Hippocampus	0.0357	0.03794
Precuneus cortex	0.02633	0.02131
Middle frontal gyrus- rostral division	0.02612	0.02138
Lingual gyrus	0.02318	0.02391
Cerebellar hemisphere	0.02159	0.02634
Transverse temporal cortex	0.01939	0.01408
Paracentral lobule	0.01606	0.01039
Parahippocampal gyrus	0.01353	0.01201
Cingulate cortex-posterior division	0.01319	0.01225
Inferior frontal gyrus- pars opercularis	0.01276	0.00991
Middle frontal gyrus - caudal division	0.01179	0.01236
Cingulate cortex- rostral anterior division	0.01131	0.01135
Isthmus division of cingulate cortex	0.01052	0.01091
Entorhinal cortex	0.00989	0.01104
Pericalcarine cortex	0.00985	0.01062
Inferior frontal gyrus- pars orbitalis	0.0077	0.0057
Inferior frontal gyrus- pars triangularis	0.00729	0.00612
Cuneus cortex	0.00622	0.00906
Banks of the superior temporal sulcus	0.00531	0.00662
Cingulate cortex- caudal anterior division	0.00396	0.00391
Frontal pole	0.00131	0.00204
Highlighted box shows structures connected by the top 20% streamline counts from the amygdalae.
