# Supplementary material for: Maternal cortisol is associated with neonatal amygdala microstructure and connectivity in a sexually dimorphic manner
Source: eLife. 2020 Nov 24;9:e60729. doi: 10.7554/eLife.60729 (PMC7685701; doi:10.7554/eLife.60729)
Supplement: Supplementary file 3. — (a) Association between maternal hair cortisol concentration (HCC) and fractional anisotropy (FA) weighted connections of the amygdalae in boys and girls (b) Associations of maternal hair cortisol concentration (HCC) and its interaction with infant sex on amygdalae volume (c) Sensitivity and subgroup analyses assessing hair cortisol concentration (HCC) and infant sex interactions (d) Pearson’s correlations between perinatal exposures and amygdala volume, microstructure and connectivity. [file elife-60729-supp3.xlsx]

## Sheet: Supplementary File 3
		Model 1	Model 2			Model 3
Side tested	Region of interest	R2	R2	HCC β	HCC	R2	‘HCC x sex’ β	‘HCC x sex’
					p-value			p-value
Left	Thalamus	0.477	0.477	-0.005	0.971	0.522	0.479	0.097
	Putamen	0.475	0.475	0.007	0.971	0.506	0.398	0.104
	Insula	0.465	0.465	-0.003	0.971	0.501	0.426	0.104
	Superior temporal gyrus	0.531	0.532	0.028	0.971	0.544	0.242	0.299
	Inferior temporal gyrus	0.635	0.638	0.052	0.971	0.644	0.183	0.343
	Middle temporal gyrus	0.561	0.567	0.084	0.971	0.569	0.103	0.56
	Caudate	0.276	0.277	-0.027	0.971	0.285	0.196	0.448
	Lateral orbitofrontal cortex	0.636	0.636	-0.026	0.971	0.649	0.255	0.228
Right	Thalamus	0.438	0.439	0.034	0.829	0.453	0.267	0.294
	Putamen	0.506	0.51	0.068	0.829	0.583	0.606	0.007
	Insula	0.507	0.507	0.009	0.924	0.525	0.301	0.22
	Superior temporal gyrus	0.585	0.586	0.036	0.829	0.587	0.073	0.674
	Inferior temporal gyrus	0.558	0.566	0.096	0.829	0.575	0.211	0.311
	Middle temporal gyrus	0.573	0.574	0.032	0.829	0.58	0.174	0.37
	Caudate	0.316	0.322	0.087	0.829	0.357	0.417	0.22
	Lateral orbitofrontal cortex	0.652	0.654	-0.039	0.829	0.667	0.264	0.22
Model 1: Age at MRI, gestational age at birth, birth weight z score, Scottish Index of Multiple Deprivation 2016 quintile, infant sex
Model 2: Model 1 + (maternal HCC)
Model 3: Model 2 + (maternal HCC X infant sex interaction)
Abbreviations: HCC, hair cortisol concentration; R2, coefficient of determination; β, standardised beta coefficient; p-values are FDR adjusted probability values.

## Sheet: Supplementary File 3a
		Boys				Girls
		Model 1	Model 2			Model 1	Model 2
Side tested	Region of interest	R2	R2	HCC β	HCC p-value	R2	R2	HCC β	HCC p-value
Left	Thalamus	0.579	0.614	-0.197	0.388	0.33	0.438	0.389	0.106
	Putamen	0.656	0.677	-0.15	0.388	0.268	0.388	0.41	0.106
	Insula	0.532	0.558	-0.168	0.388	0.426	0.461	0.221	0.253
	Superior temporal gyrus	0.6	0.607	-0.083	0.709	0.413	0.472	0.288	0.165
	Inferior temporal gyrus	0.639	0.641	-0.037	0.825	0.659	0.707	0.262	0.106
	Middle temporal gyrus	0.608	0.609	0.016	0.878	0.495	541	0.256	0.165
	Caudate	0.399	0.402	-0.054	0.825	0.256	0.277	0.172	0.428
	Lateral orbitofrontal cortex	0.683	0.691	-0.095	0.643	0.607	0.615	0.107	0.448
Right	Thalamus	0.583	0.59	-0.087	0.858	0.279	0.347	0.31	0.168
	Putamen	0.526	0.562	-0.2	0.484	0.522	0.613	0.359	0.124
	Insula	0.631	0.642	-0.111	0.751	0.39	0.426	0.226	0.259
	Superior temporal gyrus	0.62	0.62	-0.004	0.968	0.514	0.533	0.166	0.33
	Inferior temporal gyrus	0.533	0.533	-0.005	0.968	0.554	0.623	0.31	0.13
	Middle temporal gyrus	0.594	0.596	-0.051	0.858	0.507	0.552	0.252	0.168
	Caudate	0.373	0.378	-0.075	0.858	0.35	0.431	0.337	0.149
	Lateral orbitofrontal cortex	0.682	0.702	-0.148	0.484	0.603	0.613	0.121	0.394
Model 1: Age at MRI, gestational age at birth, birth weight z score, Scottish Index of Multiple deprivation 2016 quintile
Model 2: Model 1 + (maternal HCC).
Abbreviations: HCC, hair cortisol concentration; R2, coefficient of determination; β, standardised beta coefficient; p-values are FDR adjusted probability values.; p-values are FDR adjusted probability values

## Sheet: Supplementary File 3b
	Model 1	Model 2			Model 3
Side tested	R2	R2	HCC β	HCC	R2	‘HCC x sex’ β	‘HCC x sex’ p-value
				p-value
Left	0.14	0.168	-0.182	0.124	0.18	0.247	0.315
Right	0.22	0.223	-0.056	0.624	0.224	0.078	0.743
Model 1: Age at MRI, gestational age at birth, birth weight z score, Scottish Index of Multiple deprivations 2016 quintile, infant sex
Model 2 variables: Model 1 + (maternal HCC)
Model 3: Model 2 + (maternal HCC x infant sex interaction)
Abbreviations: HCC, hair cortisol concentration; R2, coefficient of determination; β, standardised beta coefficient; p-values are unadjusted probability values

## Sheet: Supplementary File 3c
Imaging metric assessed	Subgroup analysed	R2	R2 change attributable to HCC x sex interaction	‘HCC x sex’ β	‘HCC x sex’
					p-value
Whole group analysis, reported in results, n=78
Left amygdala FA		0.359	0.09	0.677	0.002
Left amygdala ODI		0.181	0.07	-0.597	0.017
Mean FA of connections between the right amygdala and putamen		0.583	0.072	0.606	0.001
Analysis including only singletons and first-born twins, n=71
Left amygdala FA		0.315	0.09	0.694	0.005
Left amygdala ODI		0.174	0.094	-0.708	0.01
Mean FA of connections between the right amygdala and putamen		0.594	0.081	0.659	0.001
Sub-group analysis of term and preterm infants (term n=42, preterm n=36)
Left amygdala FA	Term	0.411	0.068	0.735	0.057
	Preterm	0.373	0.114	0.64	0.032
Left amygdala ODI	Term	0.182	0.063	-0.71	0.115
	Preterm	0.268	0.105	-0.614	0.054
Mean FA of connections between the right amygdala and putamen	Term	0.667	0.067	0.733	0.013
	Preterm	0.575	0.051	0.426	0.079
Model: Age at MRI, gestational age at birth, birth weight z score, Scottish Index of Multiple deprivation 2016 quintile, infant sex, maternal HCC, maternal HCC x infant sex interaction
Abbreviations: HCC, hair cortisol concentration; R2, coefficient of determination; β, standardised beta coefficient; p-values are unadjusted probability values

## Sheet: Supplementary File 3d
	Left amygdala						Right amygdala
	Vol	FA	MD	ODI	NDI	FA to Putamen	Vol	FA	MD	ODI	NDI	FA to Putamen
BPD	-0.001	-0.061	0.093	0.155	-0.086	-0.163	0.194	-0.173	0.199	0.207	-0.149	-0.295
Late onset sepsis	-0.06	-0.211	0.048	0.269	-0.007	-0.164	0.239	-0.251	0.19	0.318	-0.069	-0.223
HCA	-0.001	-0.118	0.122	0.098	-0.098	-0.195	-0.041	-0.148	0.064	-0.006	-0.075	-0.084
Received mechanical ventilation (any duration)	-0.081	-0.252	-0.074	0.222	-0.025	-0.16	-0.012	-.332*	0.078	0.277	-0.07	-.339**
*p=0.048
** p=0.043
BPD, bronchopulmonary dysplasia; HCA, histologic chorioamnionitis.
Inclusion of mechanical ventilation as a variable in regression models had little influence on the interactive effect of sex and maternal cortisol on left amygdala FA (b=0.660), left amygdala ODI (b=-0.584) or FA of connections between the right amygdala and putamen (b=0.590).
